# Supplementary material for: Reusable Glucose-Based Crown Ethers Anchored to PVC
Source: MDPI journal article supplement (doi:10.3390/molecules28237905), 2023-12-02
Supplement: s1 [file s1]

## Supplementary Information

# Reusable glucose-based crown ethers anchored to PVC

Bertalan Varga <sup>1</sup>, Dóra Ujj <sup>1</sup>, Béla Mátravölgyi <sup>1</sup>, Beáta Szolnoki <sup>1</sup>, Béla Koczka <sup>2</sup> and Zsolt Rapi <sup>1,\*</sup>

<sup>1</sup> Department of Organic Chemistry and Technology, Budapest University of Technology and Economics, Budapest, 1111, Hungary

<sup>2</sup> Department of Inorganic and Analytical Chemistry, Budapest University of Technology and Economics, Budapest, 1111, Hungary

\* Correspondence: [rapi.zsolt@vbk.bme.hu](mailto:rapi.zsolt@vbk.bme.hu)

| Table of contents                                                                                                              | Page    |
|--------------------------------------------------------------------------------------------------------------------------------|---------|
| – NMR spectra of crown ethers <b>1-3</b>                                                                                       | S1-S6   |
| – FTIR spectra of crown ethers <b>1-3</b> and immobilized catalysts <b>13</b> , <b>14a-b</b> , <b>15a-b</b> , and <b>16a-b</b> | S7-S16  |
| – Chiral HPLC chromatograms of <b>19</b> , <b>22</b> , and <b>25</b>                                                           | S17-S48 |

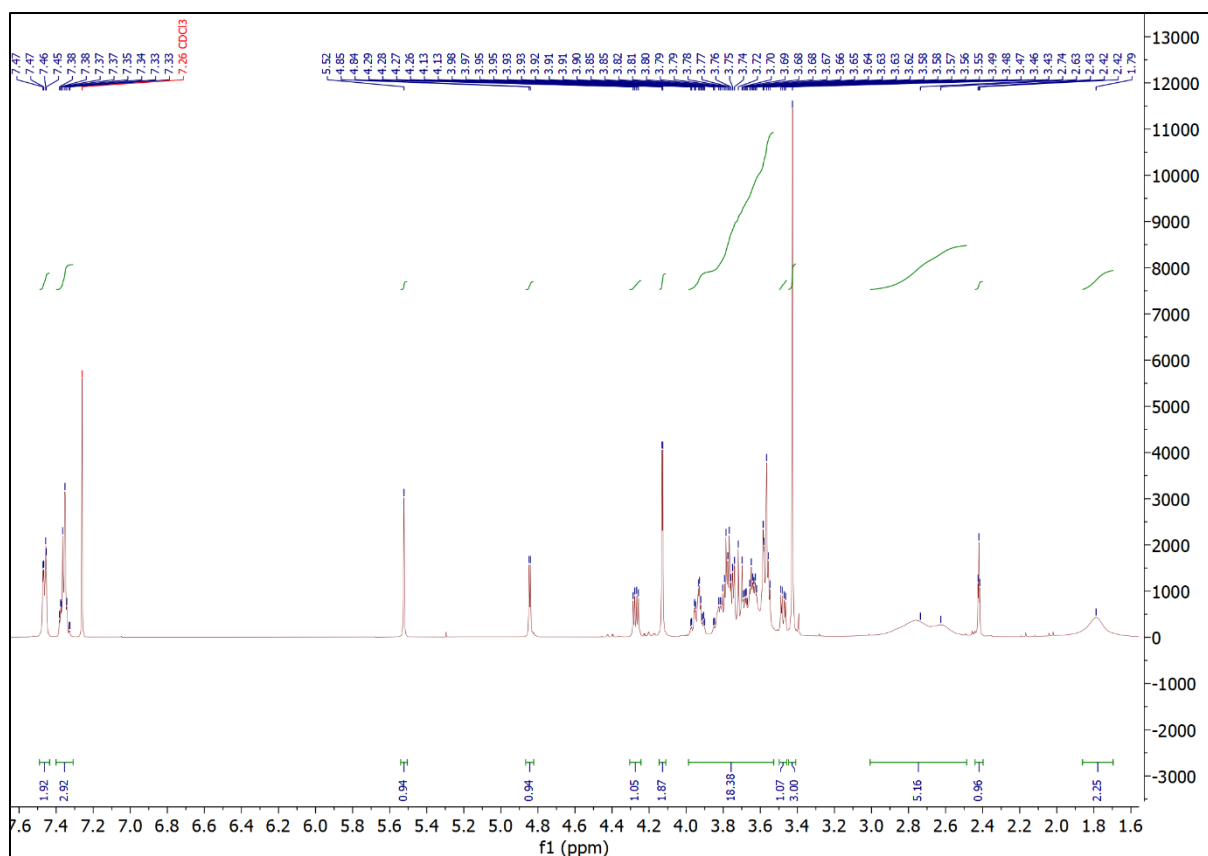

Figure S1. <sup>1</sup>H NMR spectra of crown ether 1.

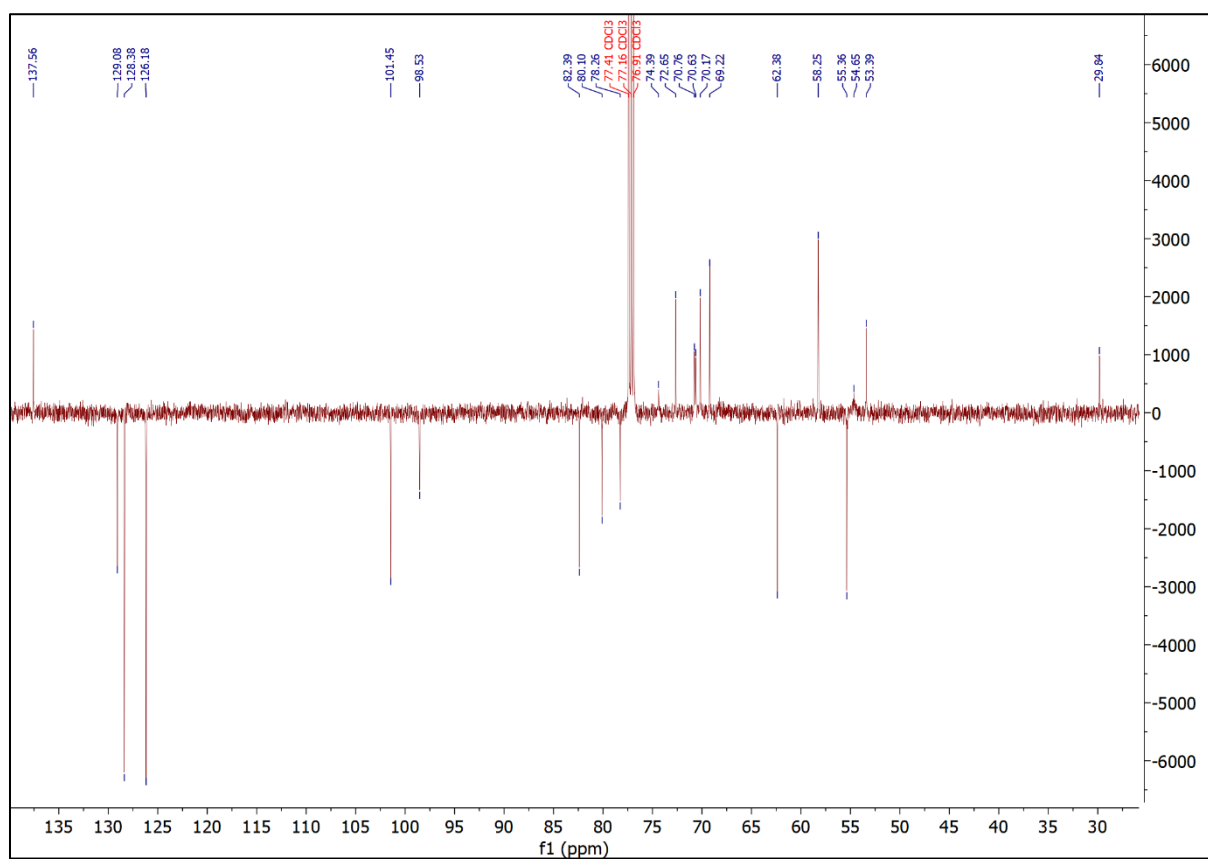

Figure S2. <sup>13</sup>C NMR (APT) spectra of crown ether 1.

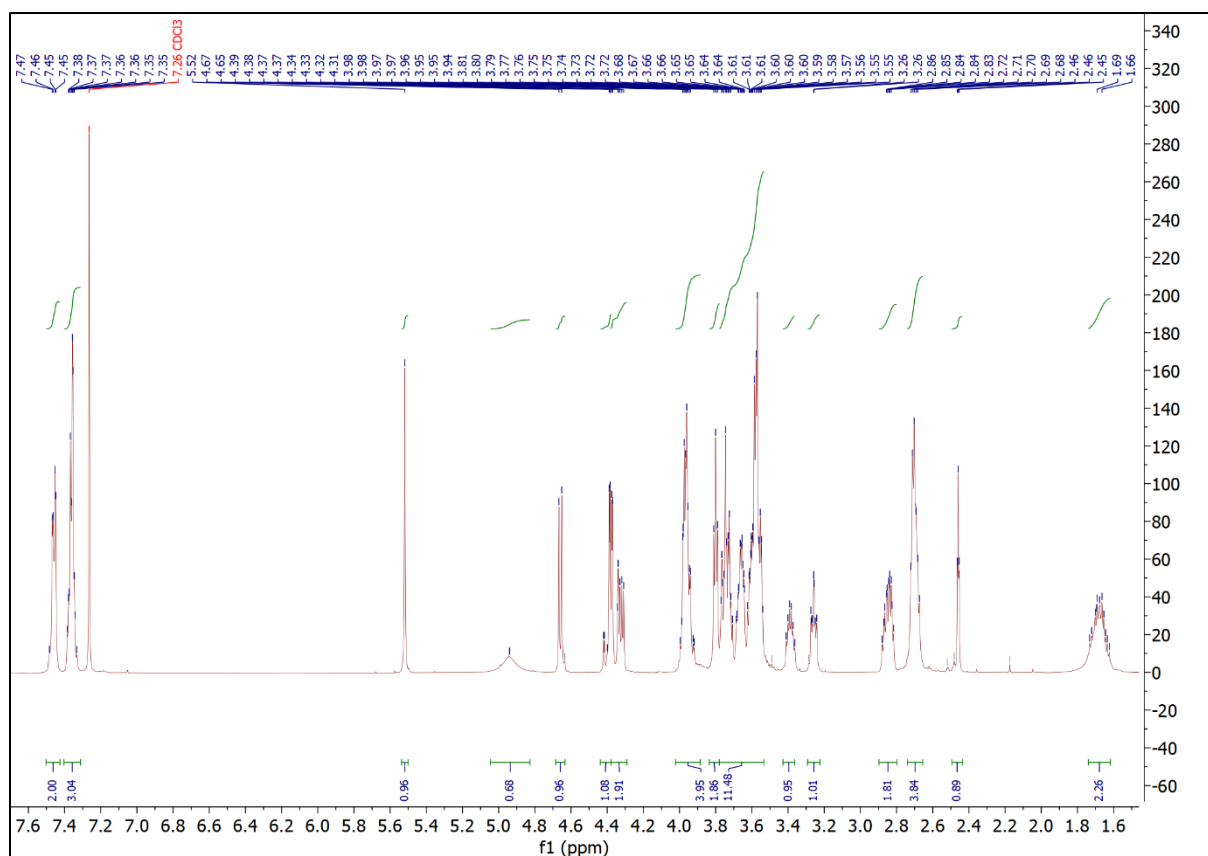

Figure S3. <sup>1</sup>H NMR spectra of crown ether 2.

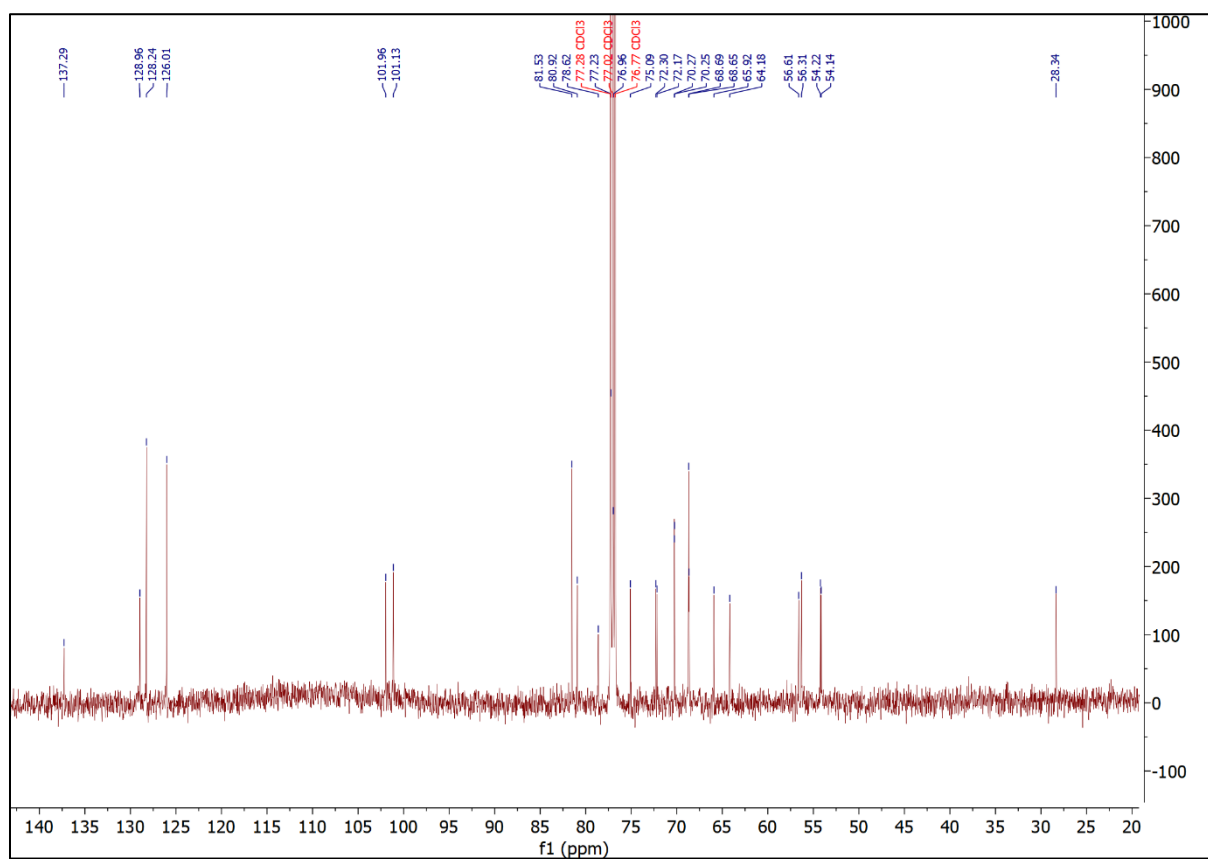

Figure S4. <sup>13</sup>C NMR (APT) spectra of crown ether 2.

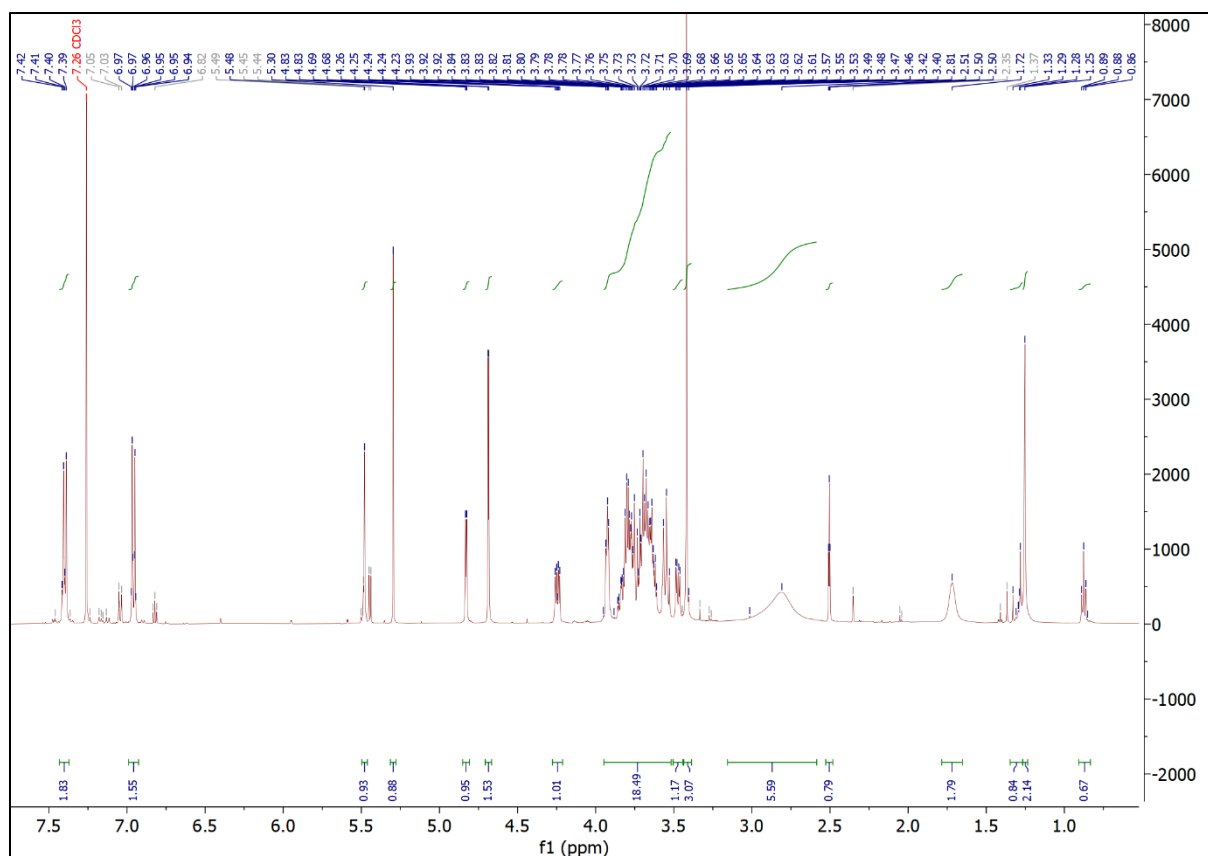

Figure S5. <sup>1</sup>H NMR spectra of crown ether 3.

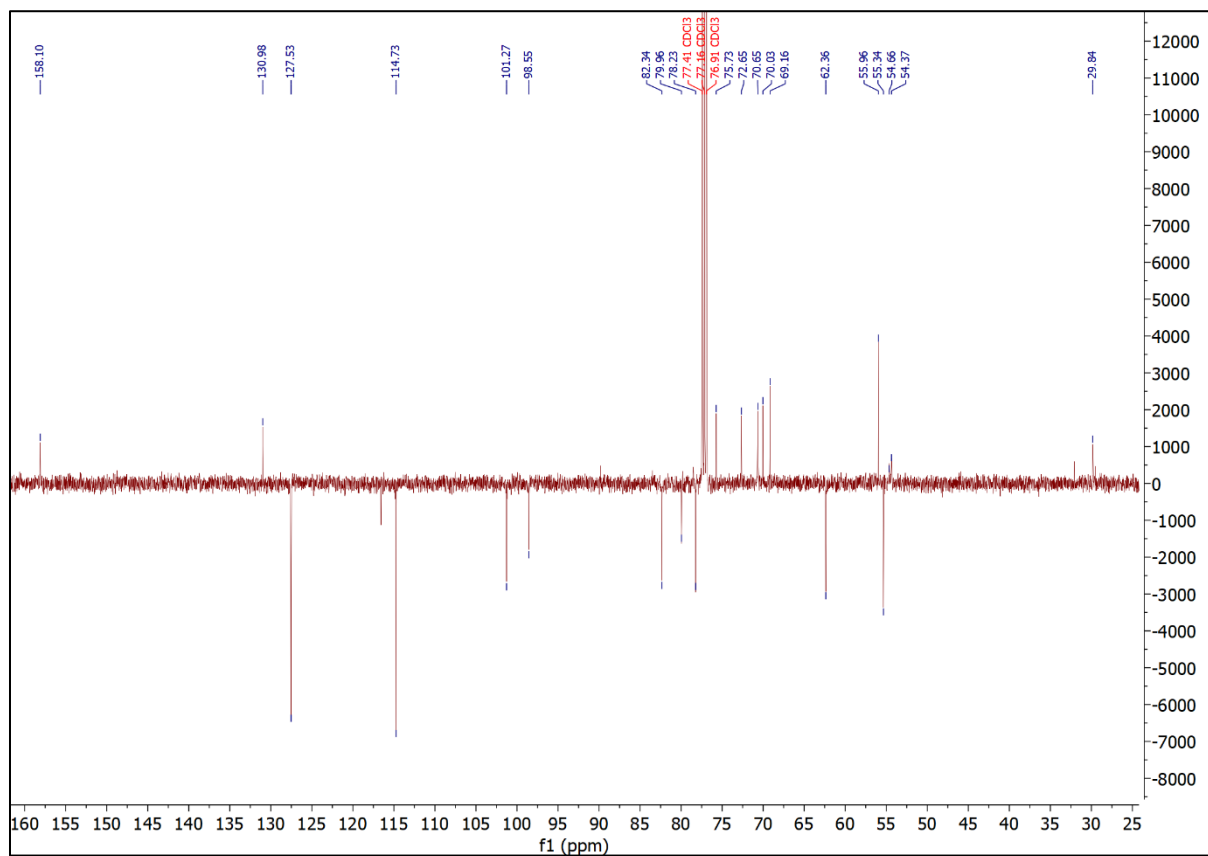

Figure S6. <sup>13</sup>C NMR (APT) spectra of crown ether 3.

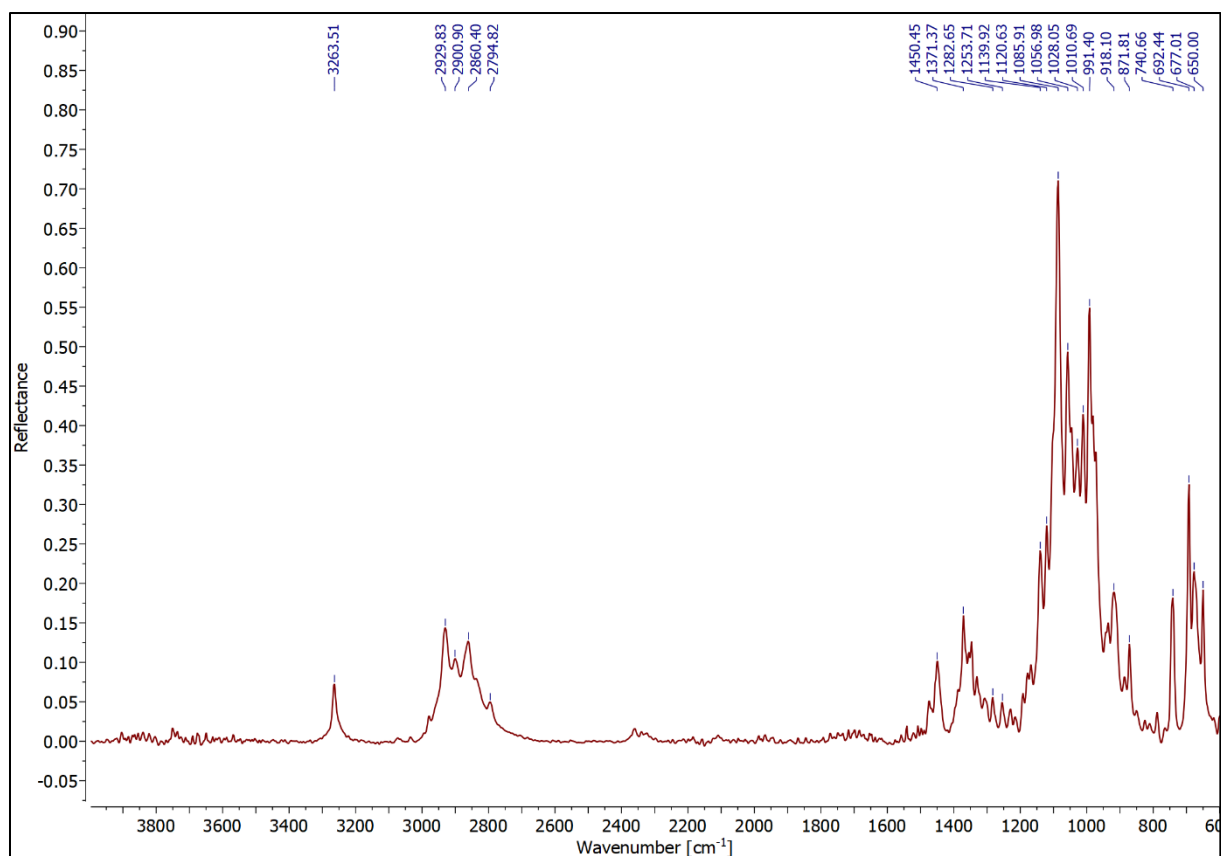

**Figure S7.** FTIR (ATR) spectra of crown ether 1.

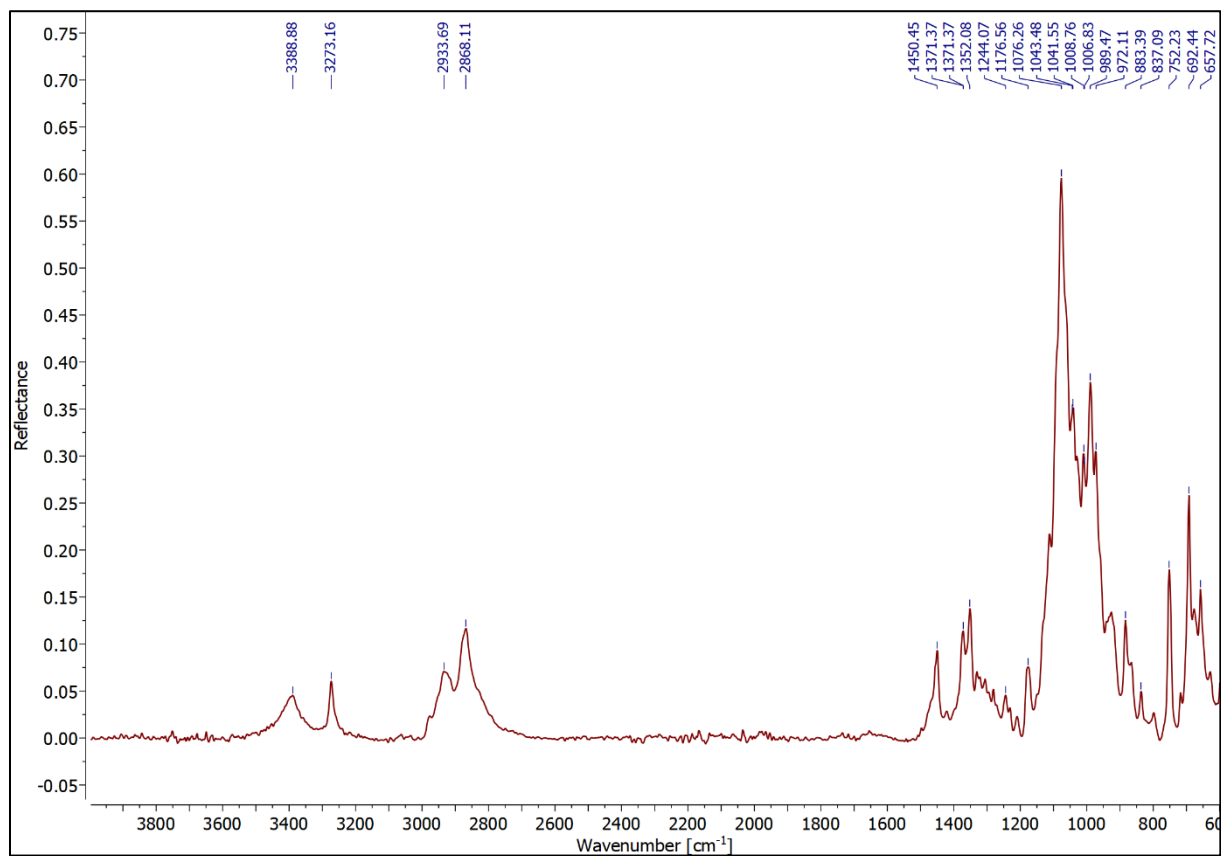

**Figure S8.** FTIR (ATR) spectra of crown ether 2.

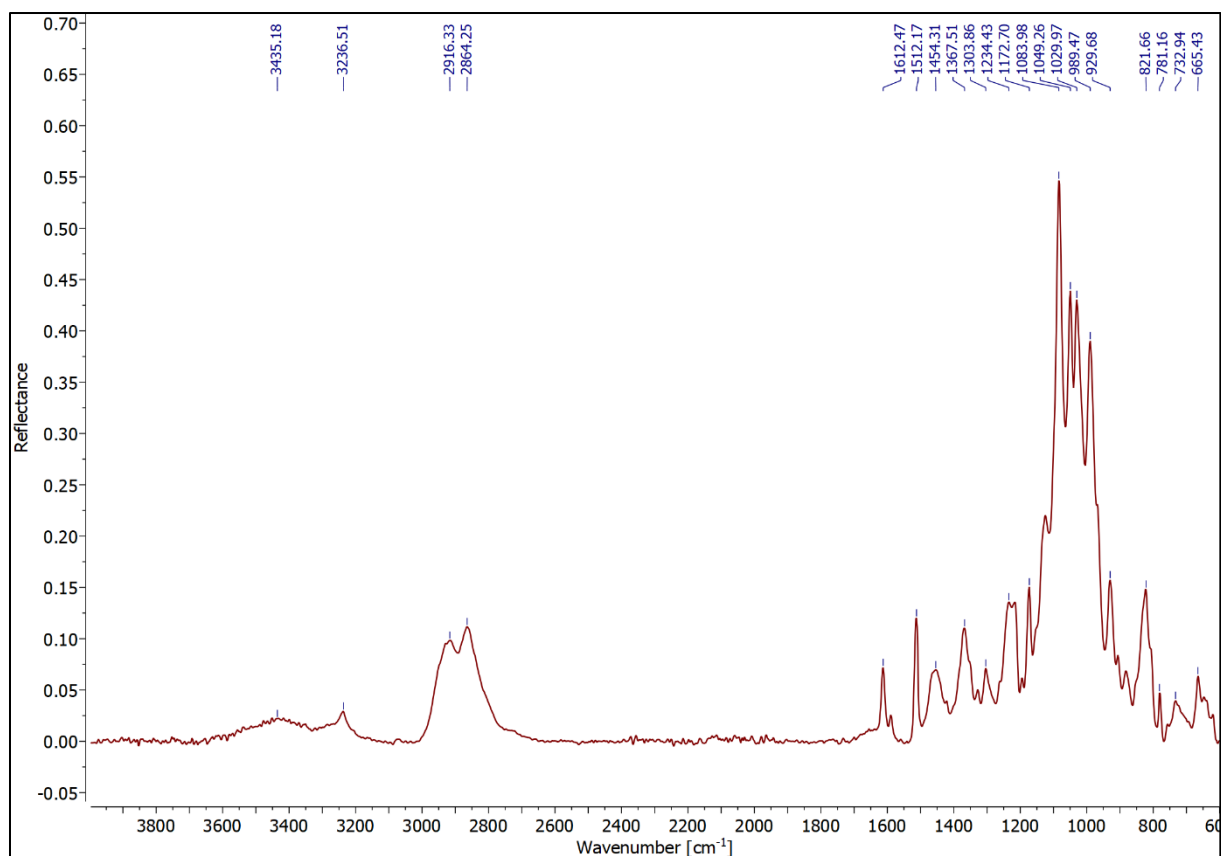

**Figure S9.** FTIR (ATR) spectra of crown ether **3**.

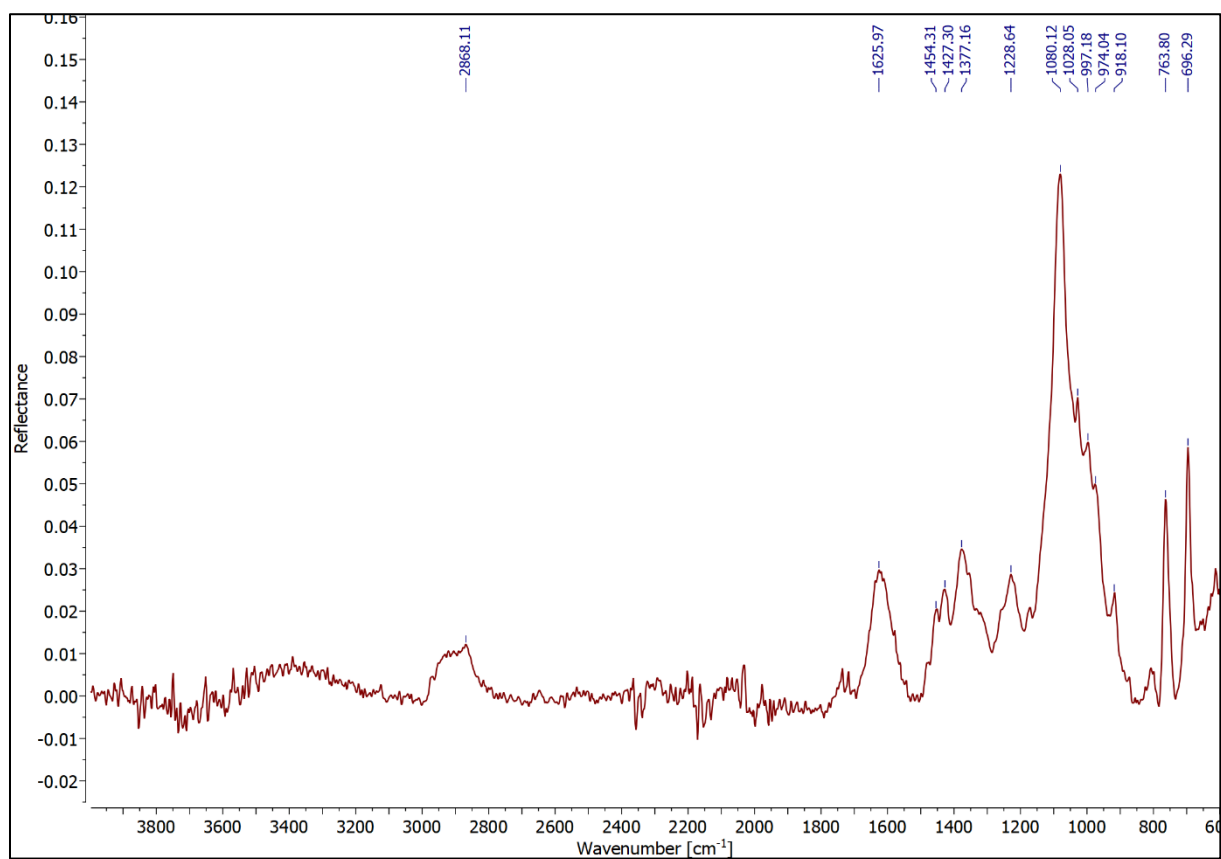

**Figure S10.** FTIR (ATR) spectra of immobilized catalyst **13**.

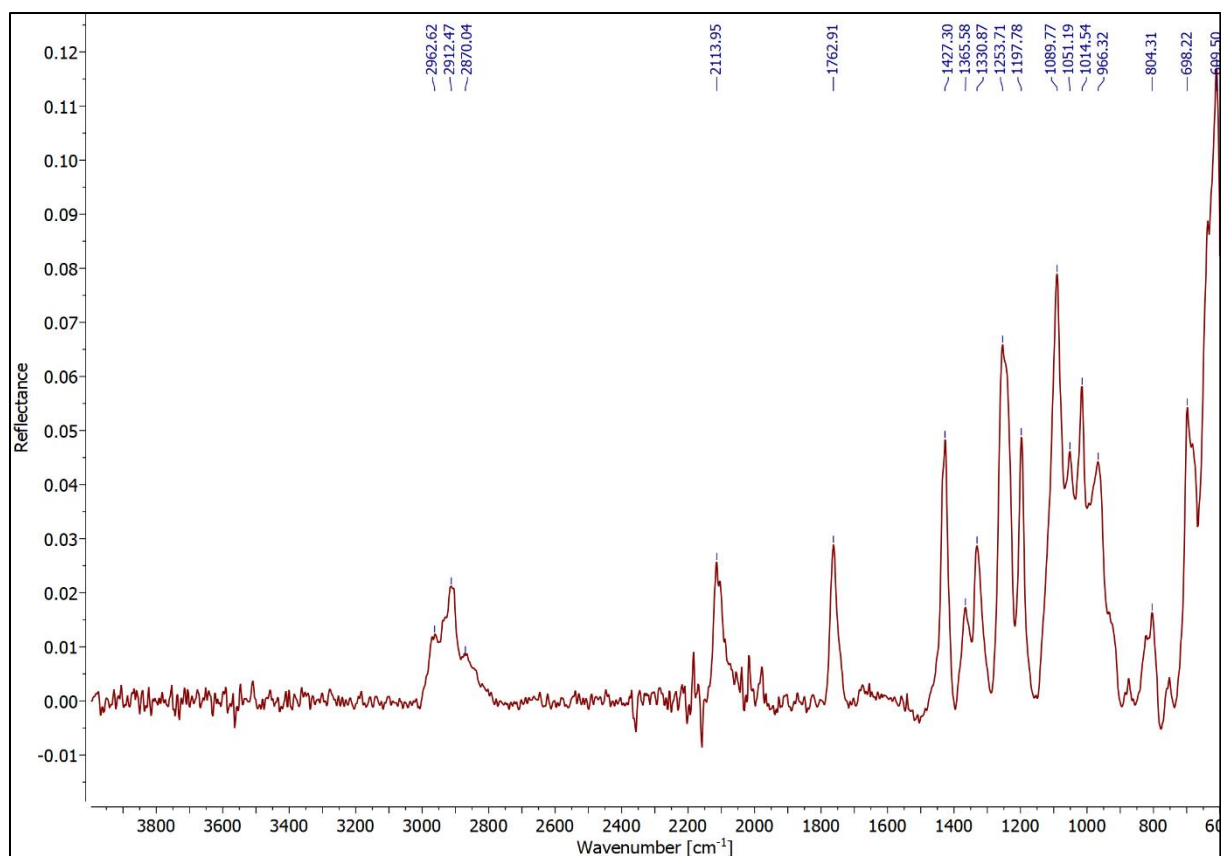

**Figure S11.** FTIR (ATR) spectra of immobilized catalyst **14a**.

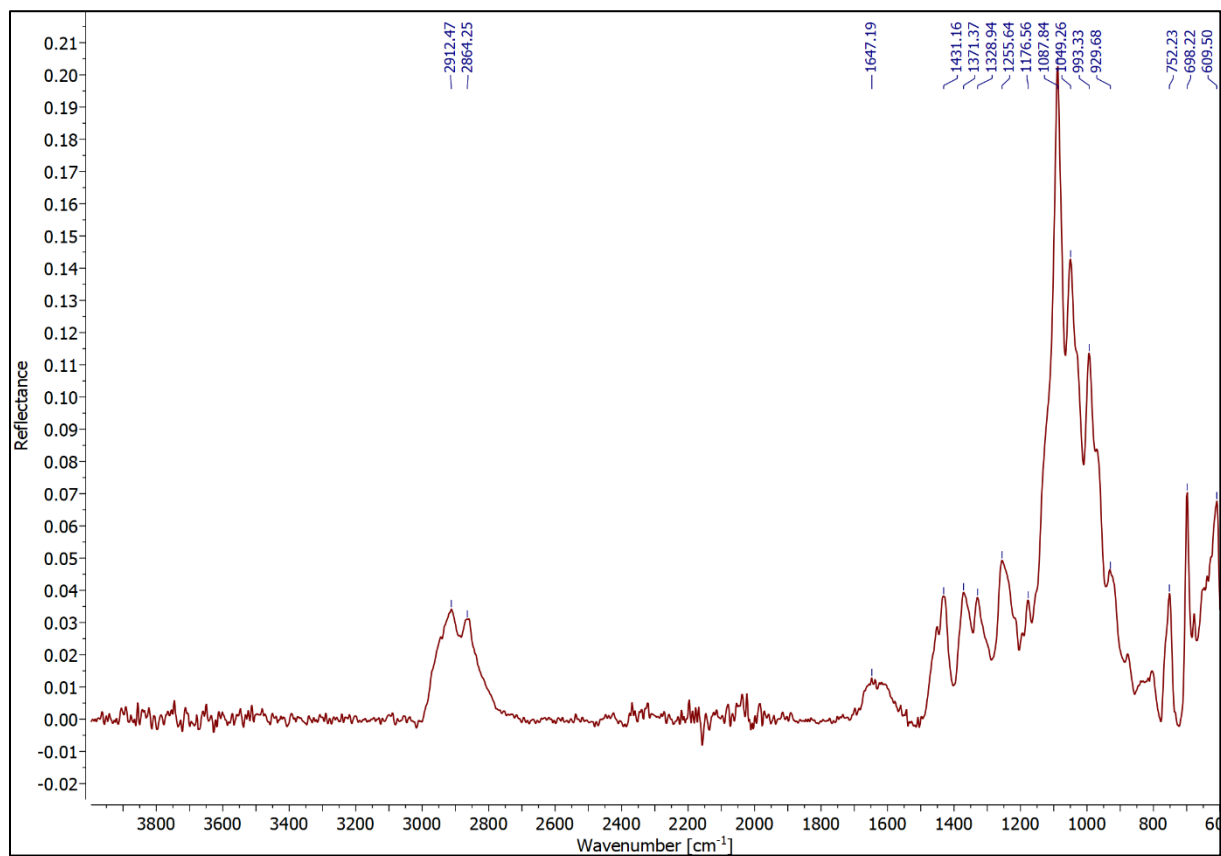

**Figure S12.** FTIR (ATR) spectra of immobilized catalyst **14b**.

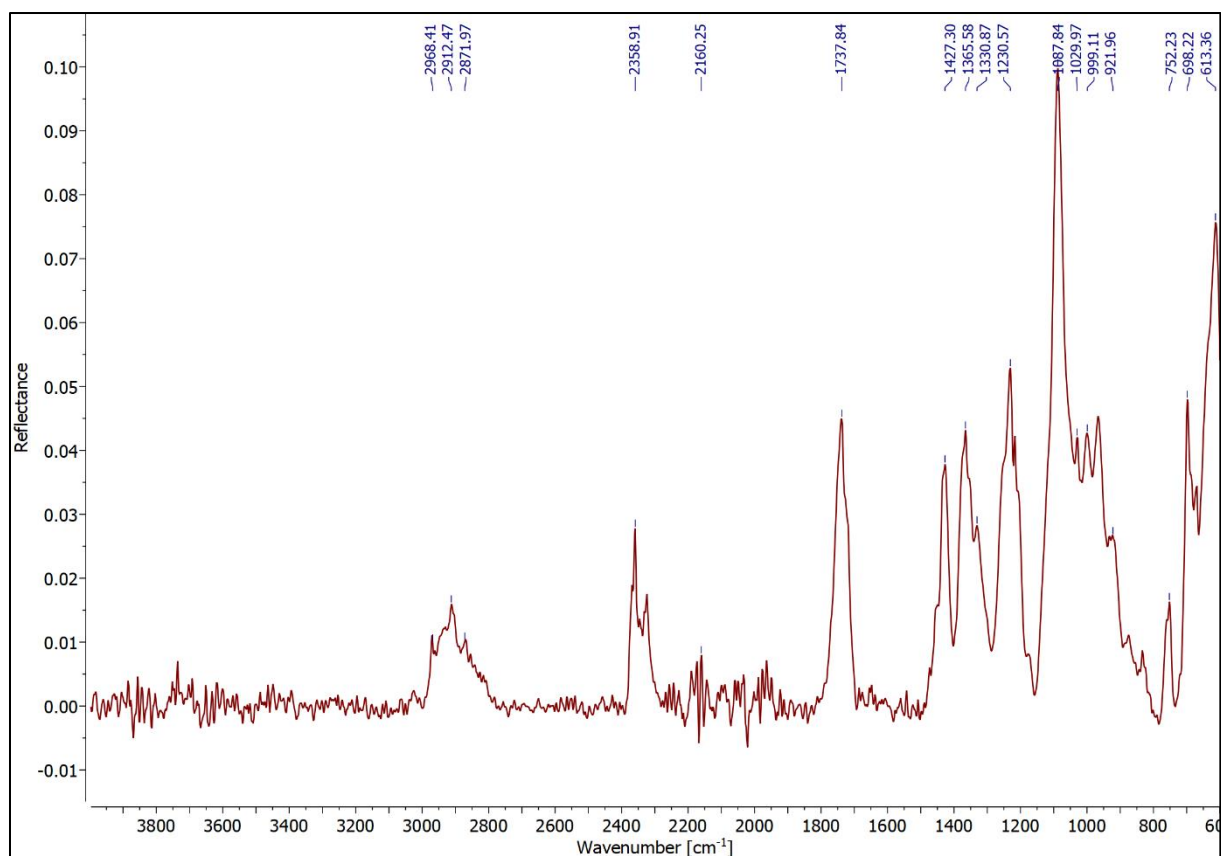

**Figure S13.** FTIR (ATR) spectra of immobilized catalyst **15a**.

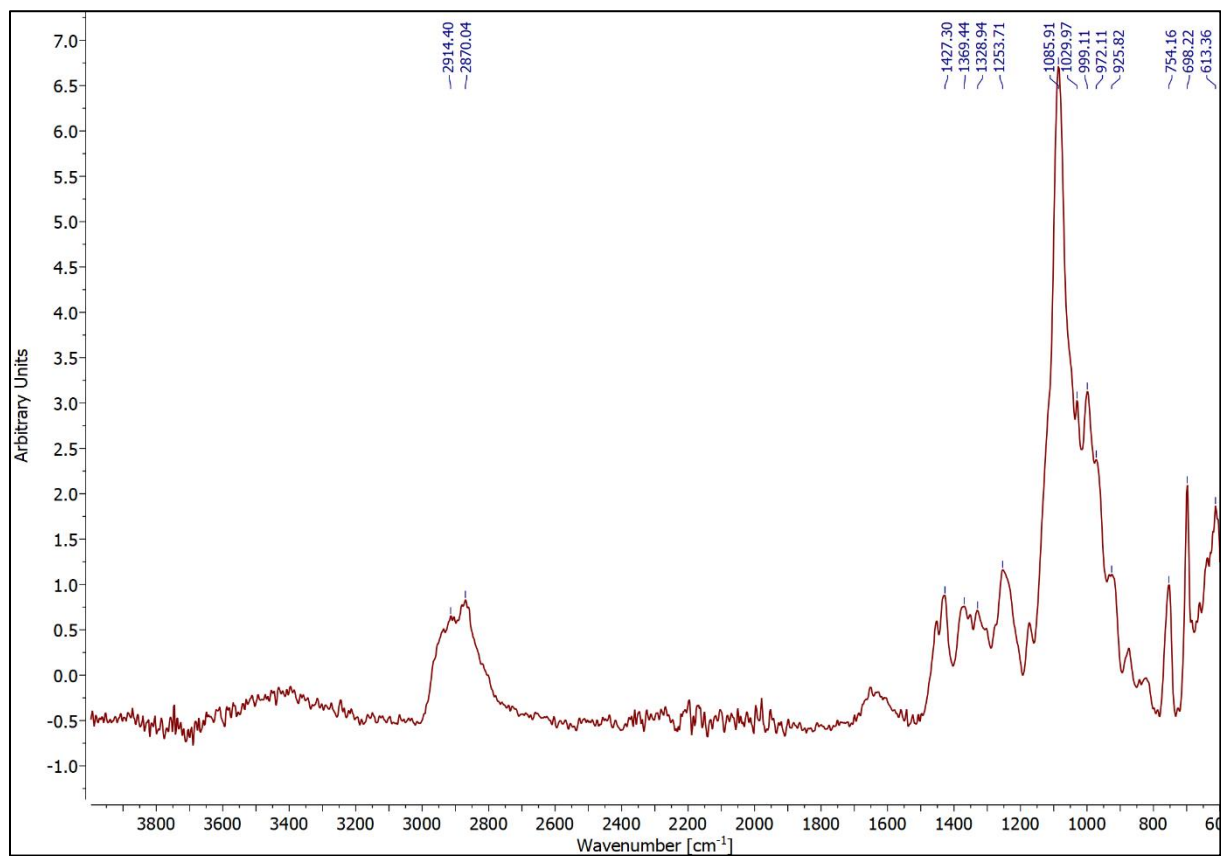

**Figure S14.** FTIR (ATR) spectra of immobilized catalyst **15b**.

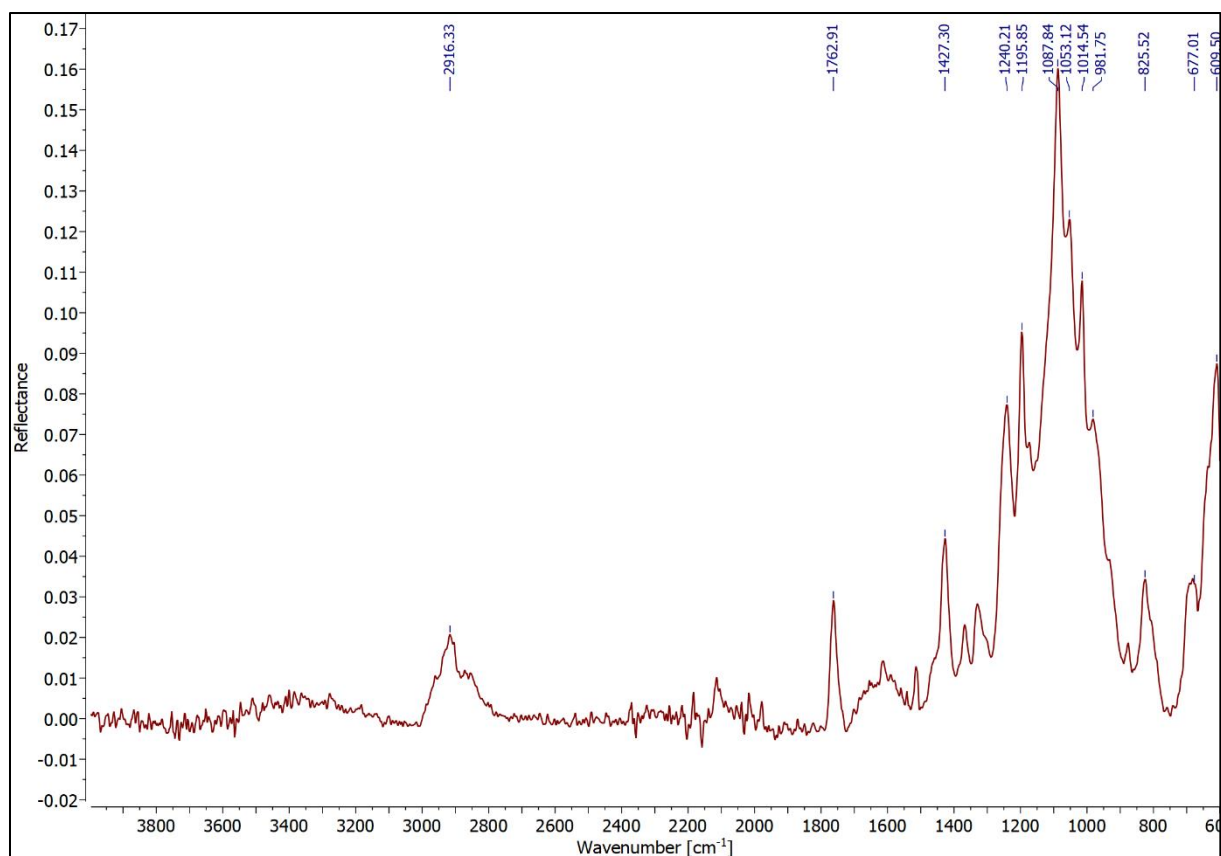

**Figure S15.** FTIR (ATR) spectra of immobilized catalyst **16a**.

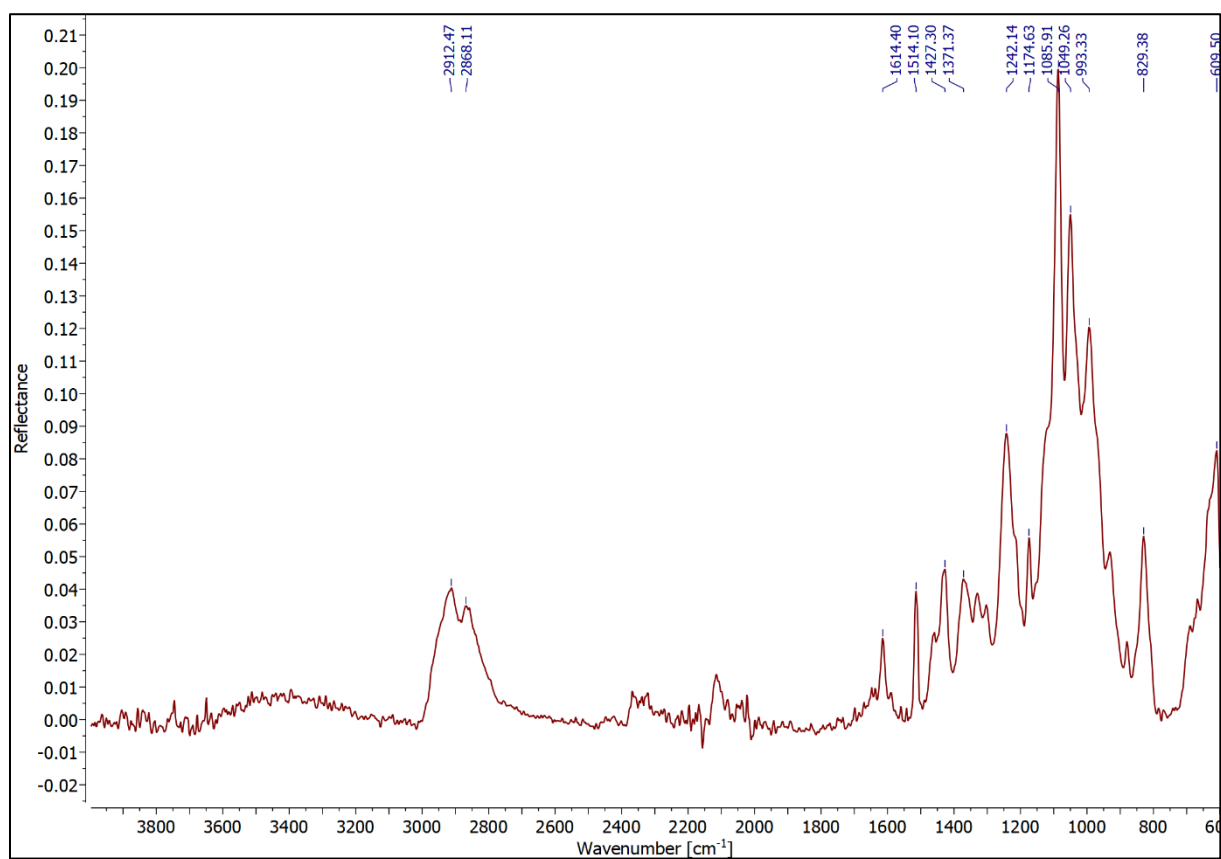

**Figure S16.** FTIR (ATR) spectra of immobilized catalyst **16b**.

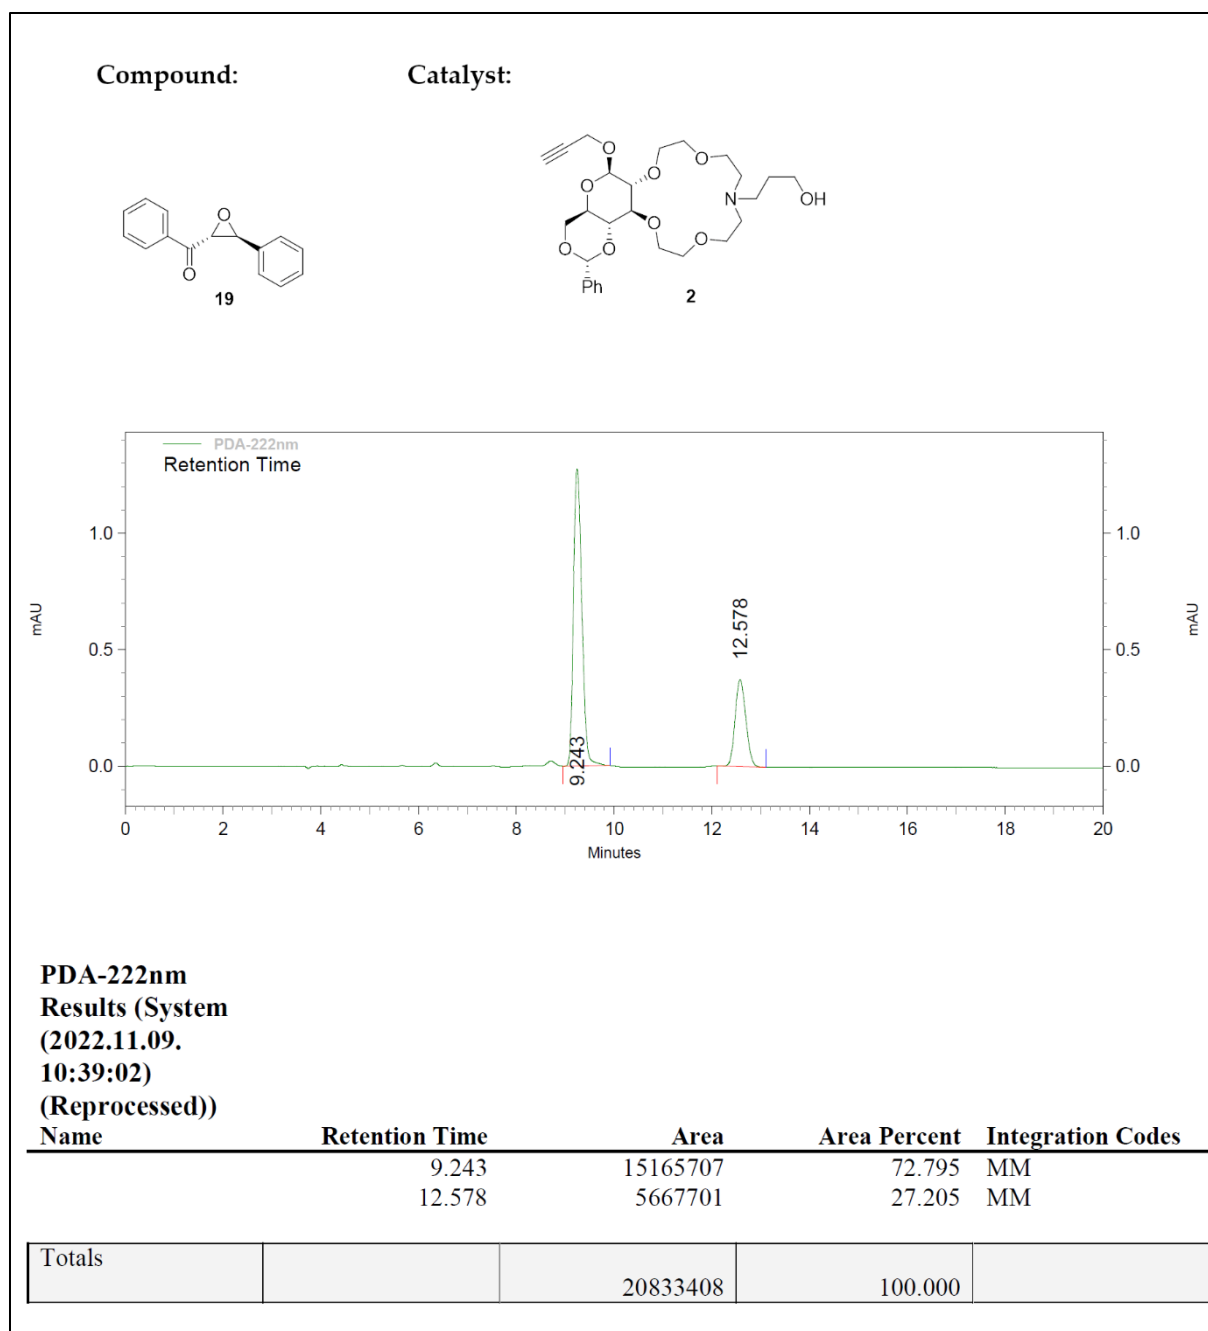

**Figure S17.** Chiral HPLC chromatogram of **19** (Scheme 5, catalyst **2**).

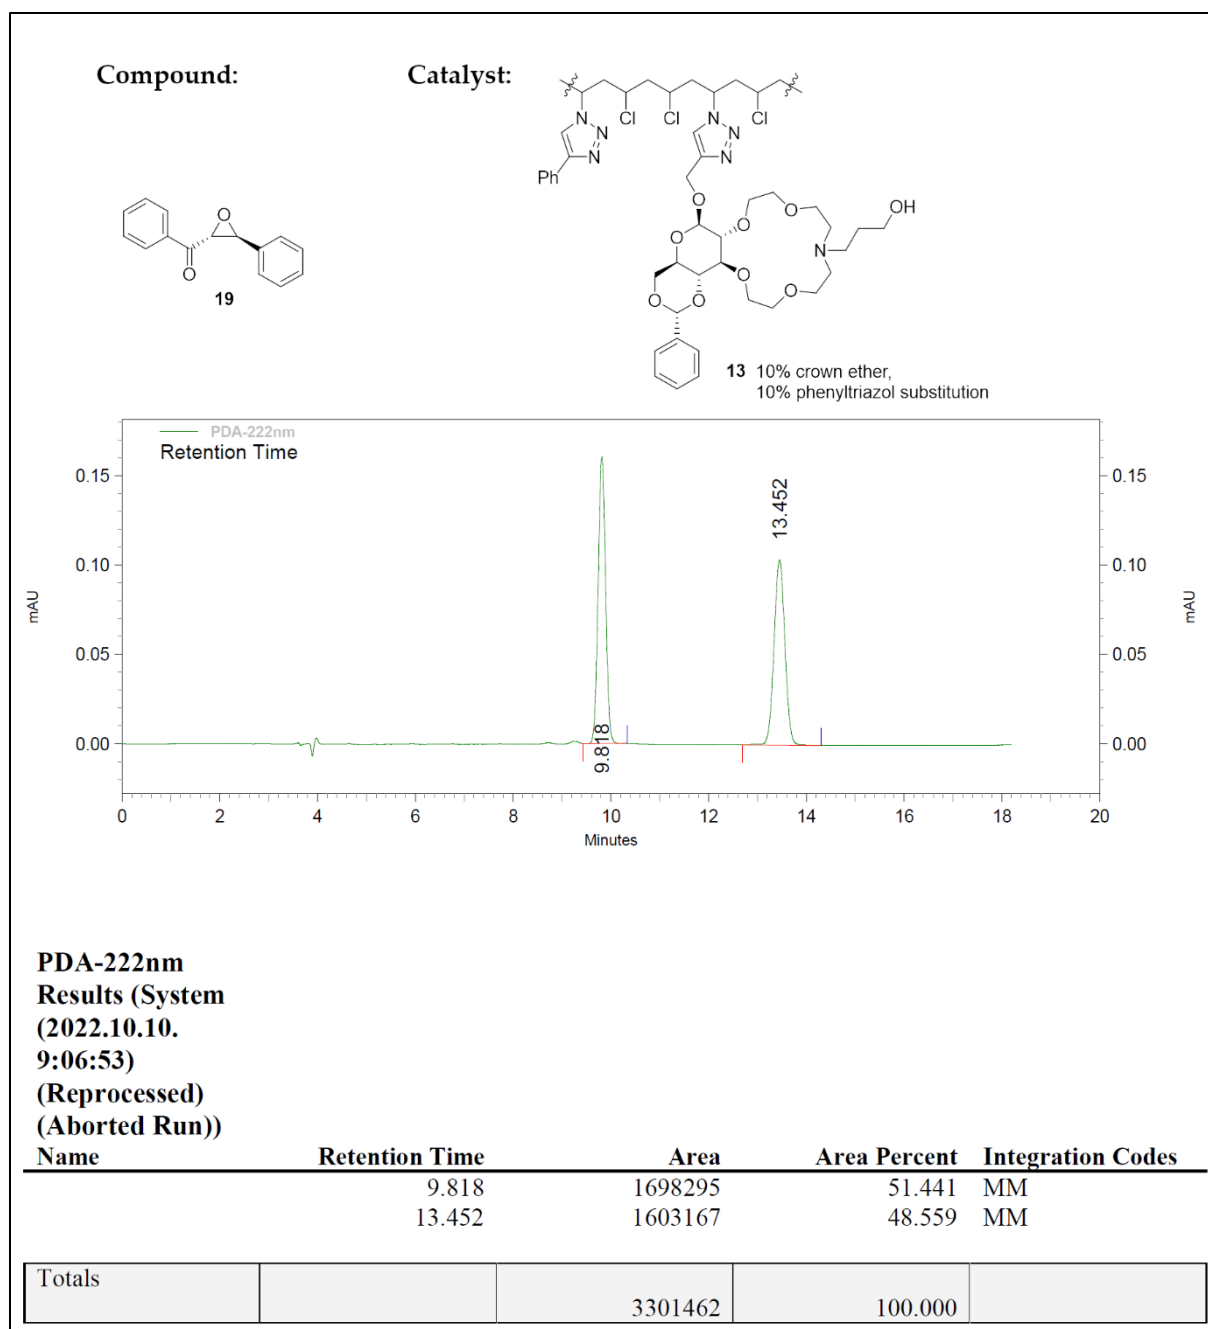

**Figure S18.** Chiral HPLC chromatogram of **19** (Scheme 5, catalyst **13**).

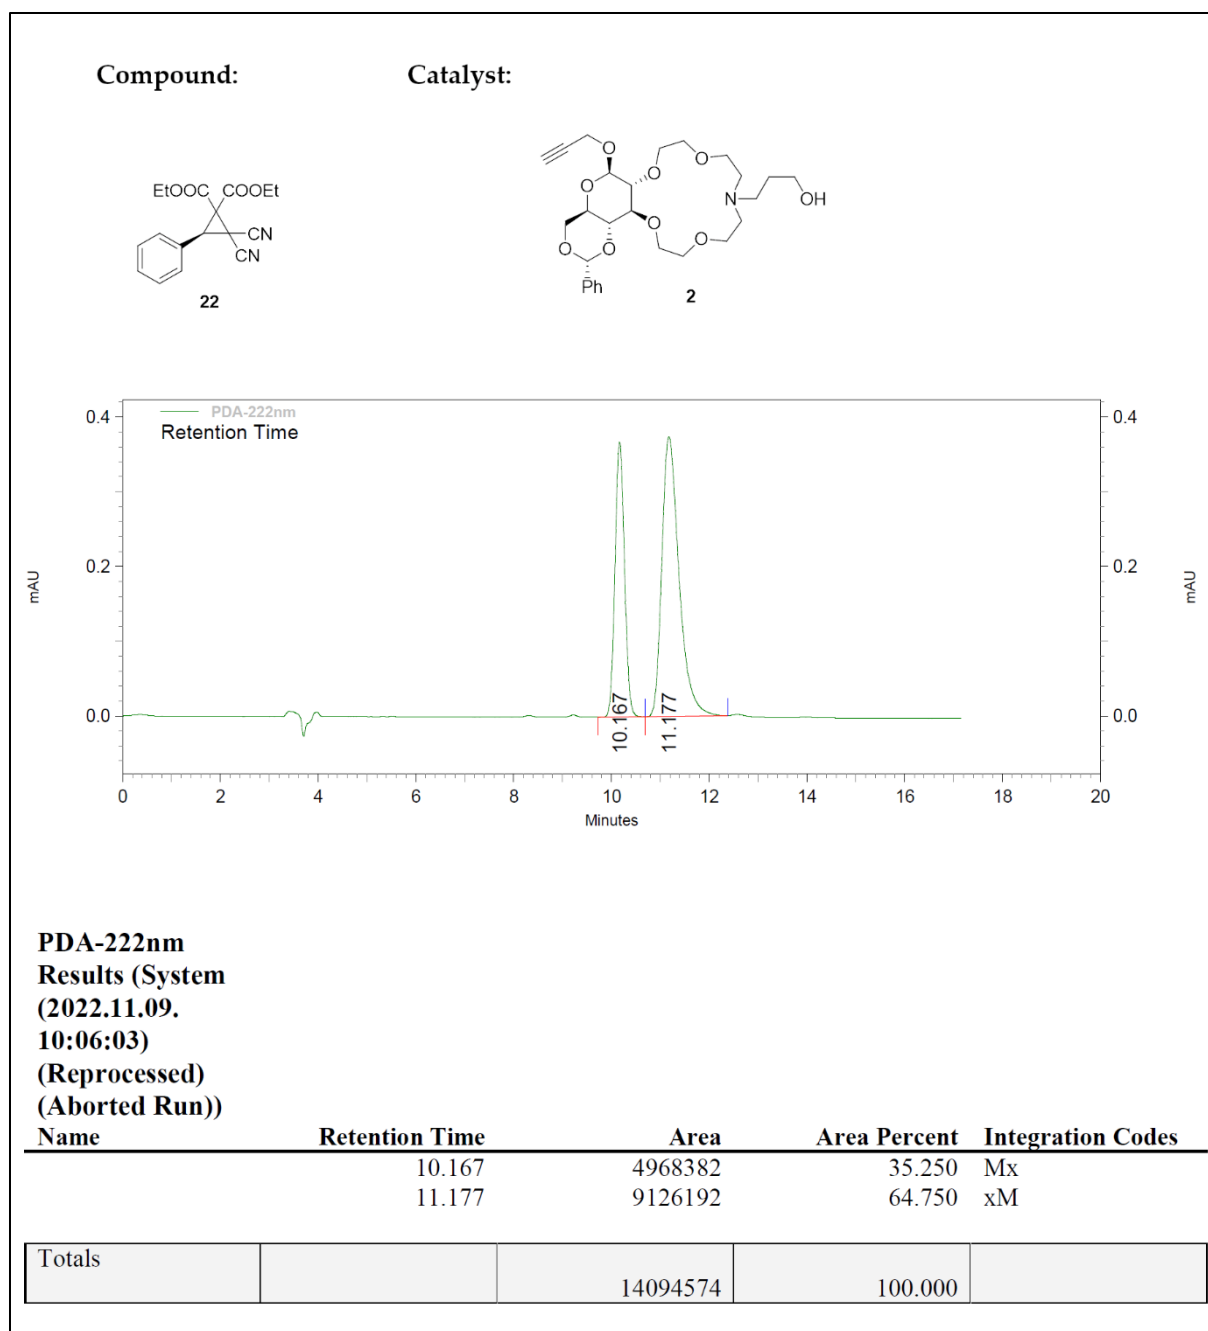

**Figure S19.** Chiral HPLC chromatogram of **22** (Scheme 6, catalyst **2**).

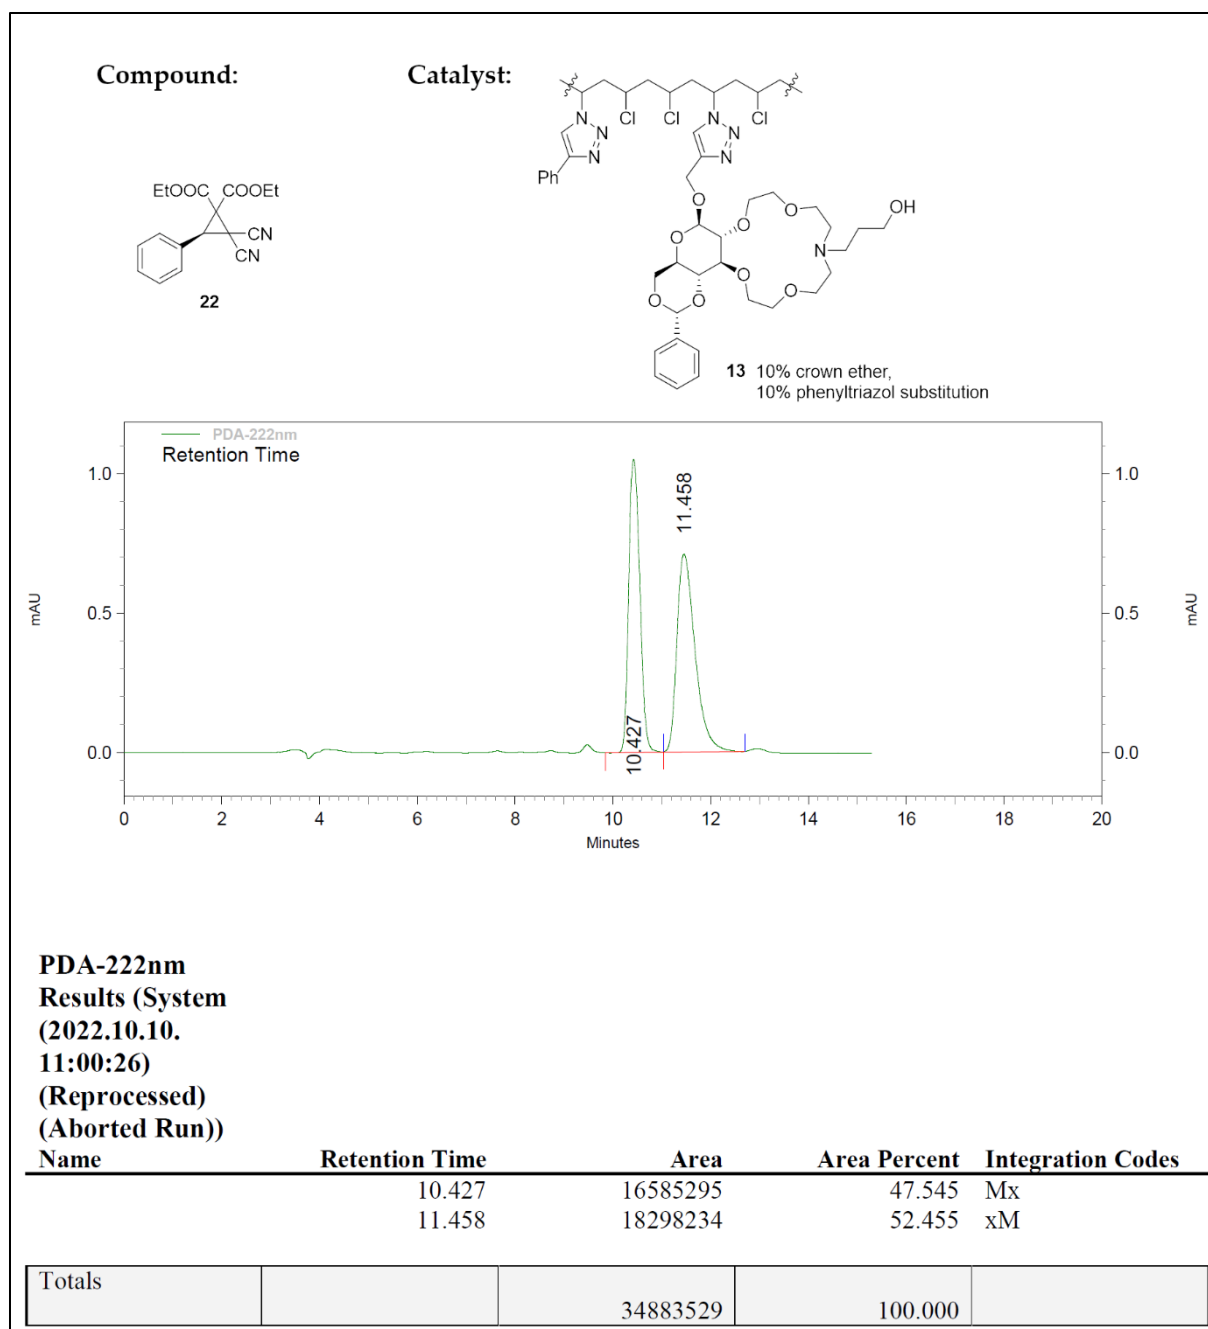

**Figure S20.** Chiral HPLC chromatogram of **22** (Scheme 6, catalyst **13**).

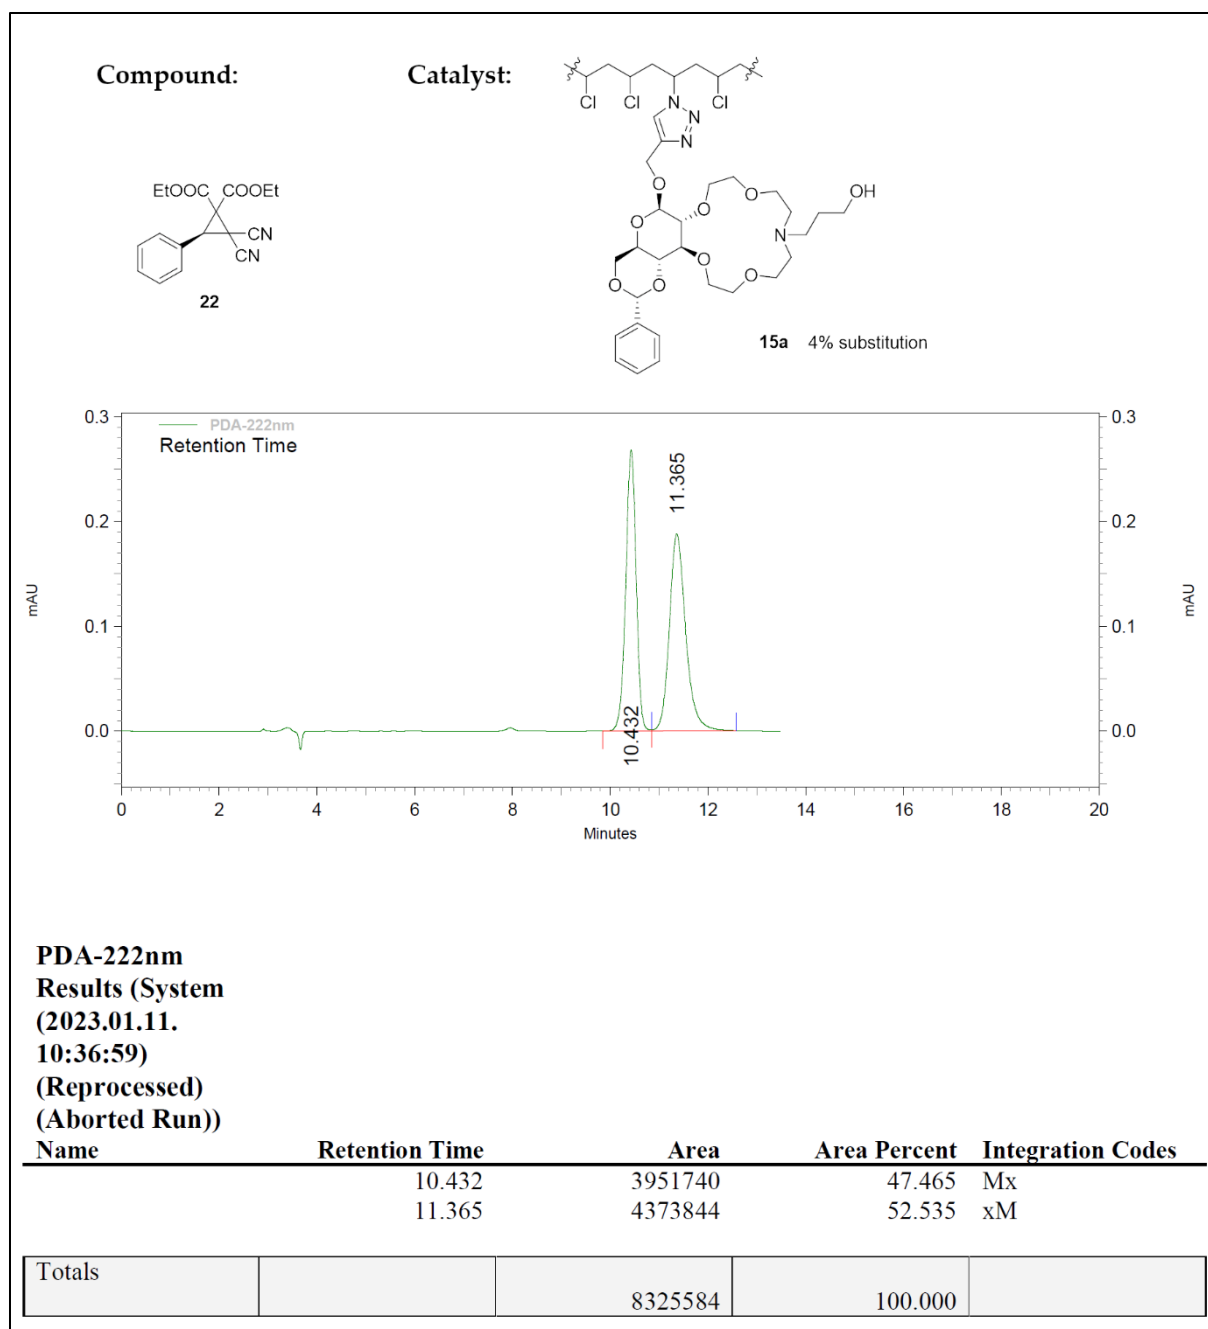

**Figure S21.** Chiral HPLC chromatogram of **22** (Scheme 6, catalyst **15a**).

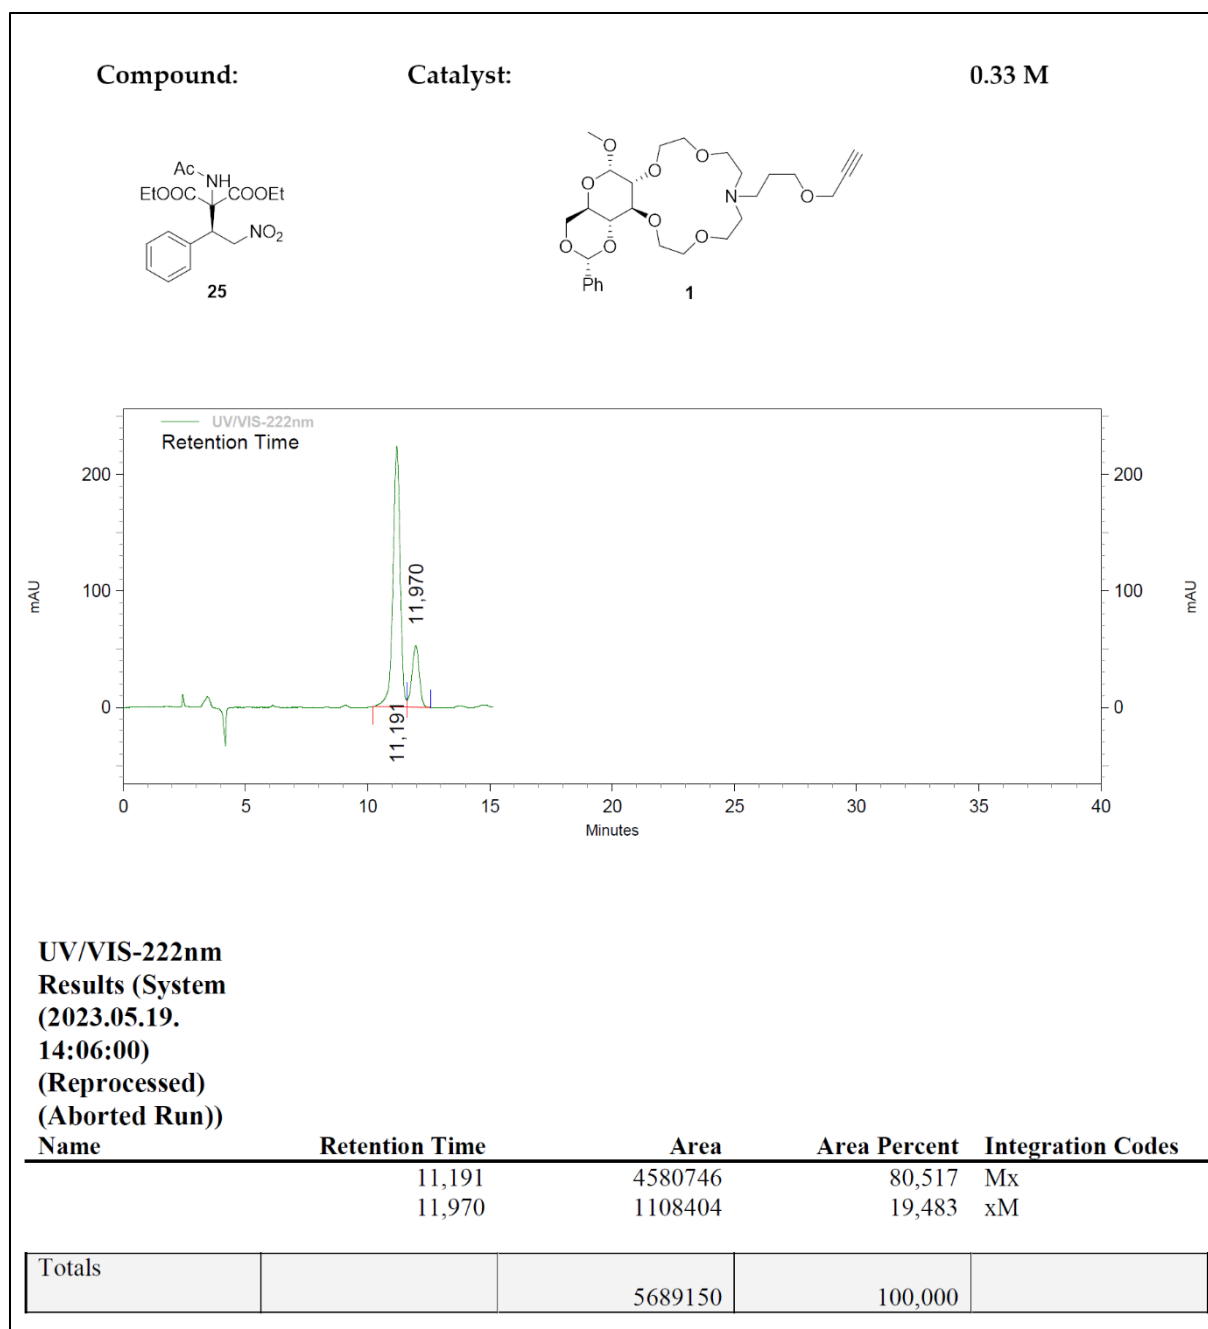

**Figure S22.** Chiral HPLC chromatogram of **25** (Table 1, Entry 1).

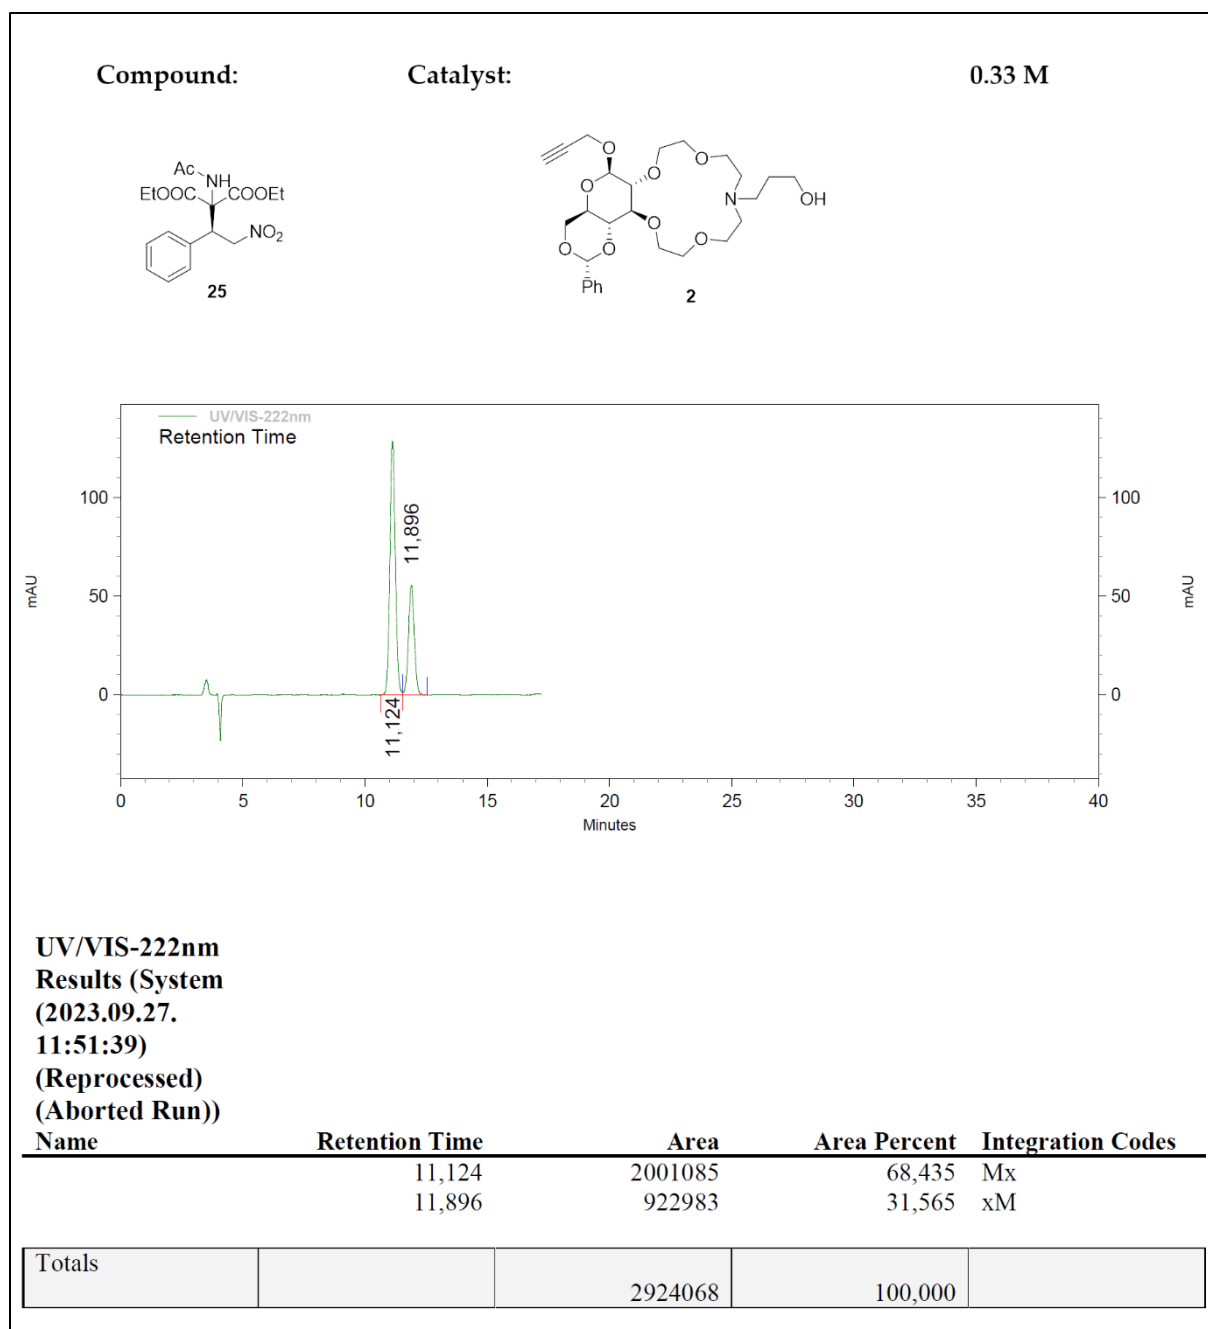

**Figure S23.** Chiral HPLC chromatogram of **25** (Table 1, Entry 2).

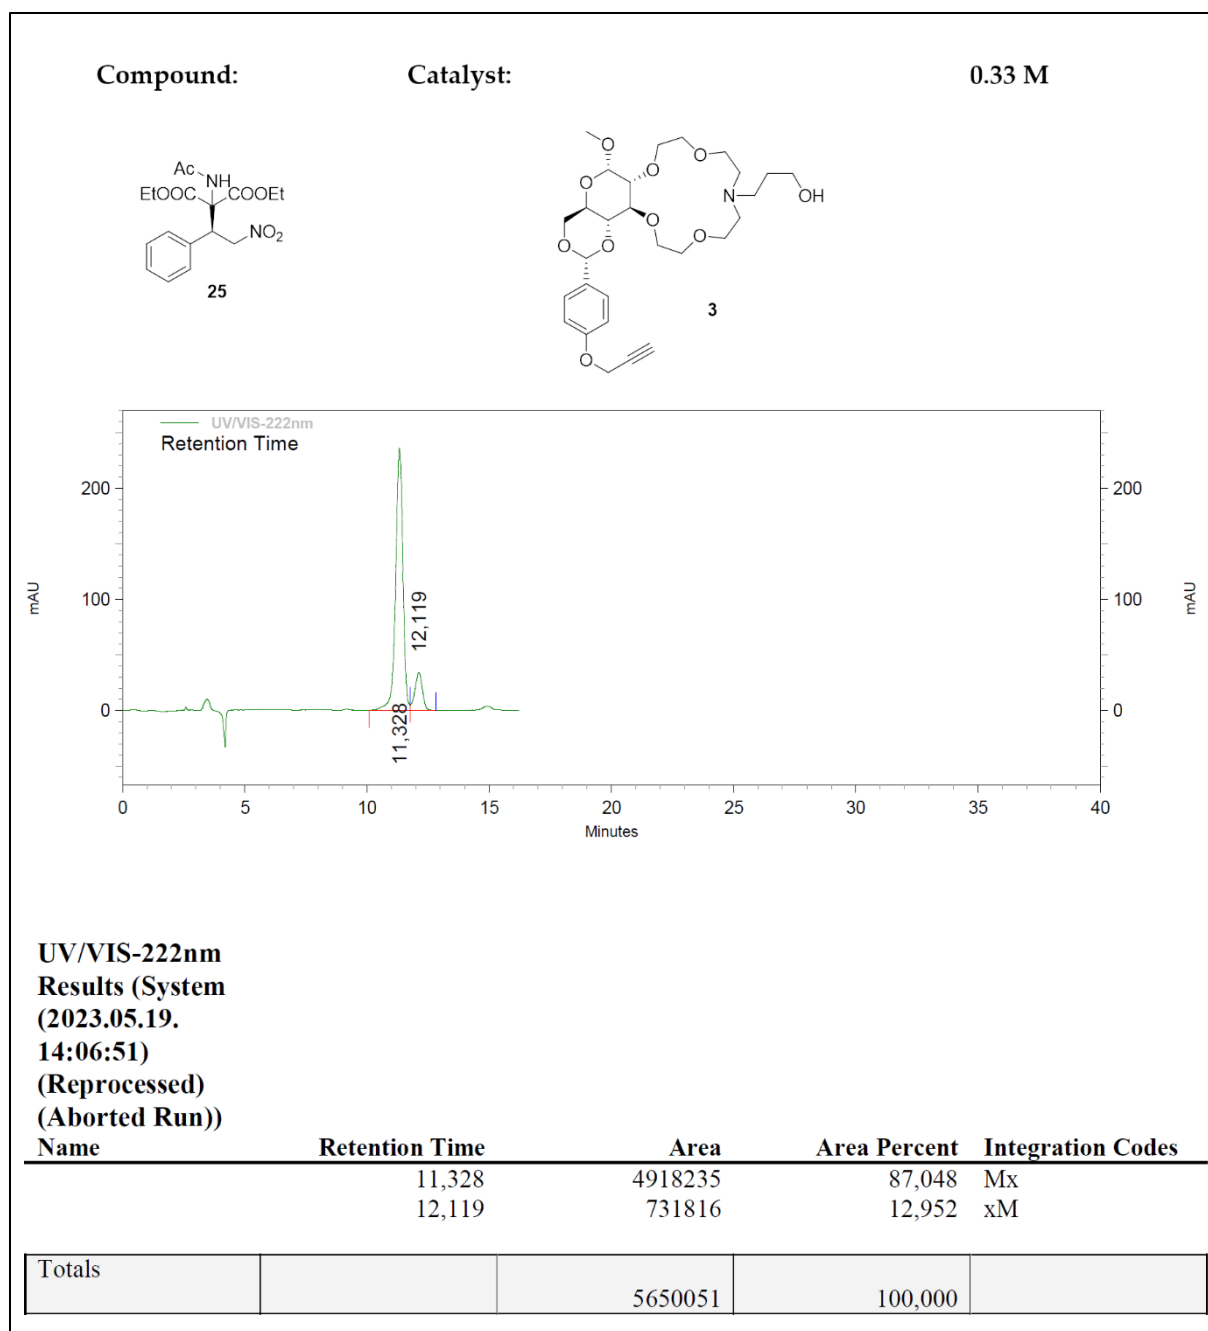

**Figure S24.** Chiral HPLC chromatogram of **25** (Table 1, Entry 3).

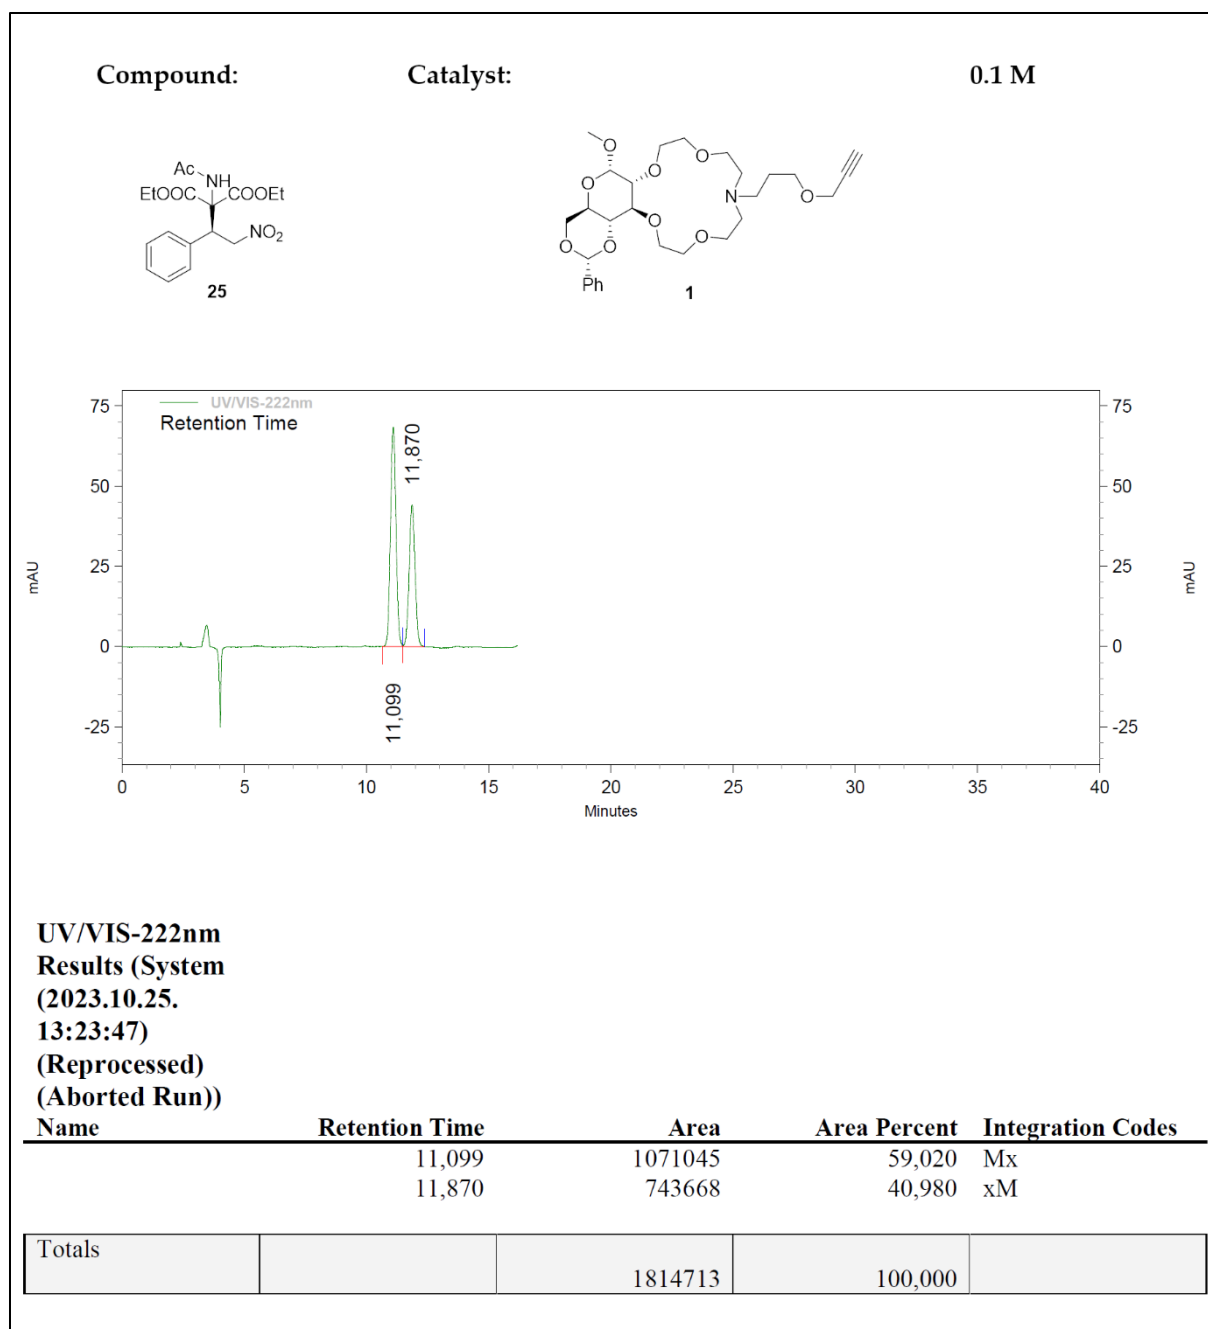

**Figure S25.** Chiral HPLC chromatogram of **25** (Table 1, Entry 4).

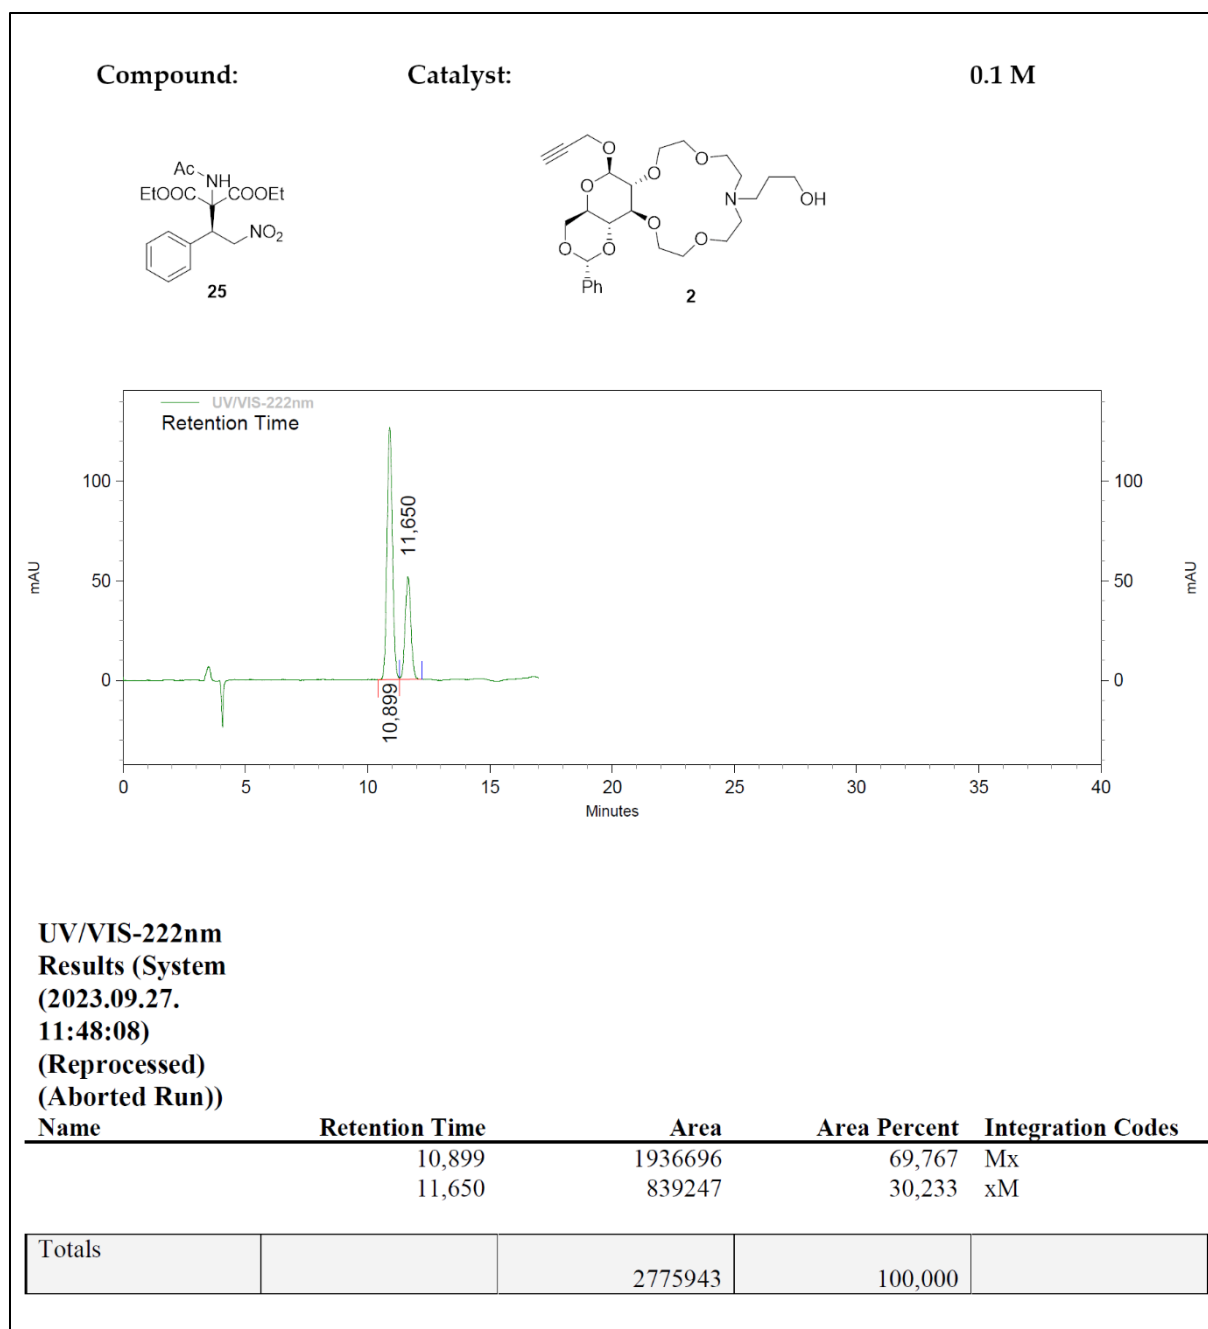

**Figure S26.** Chiral HPLC chromatogram of **25** (Table 1, Entry 5).

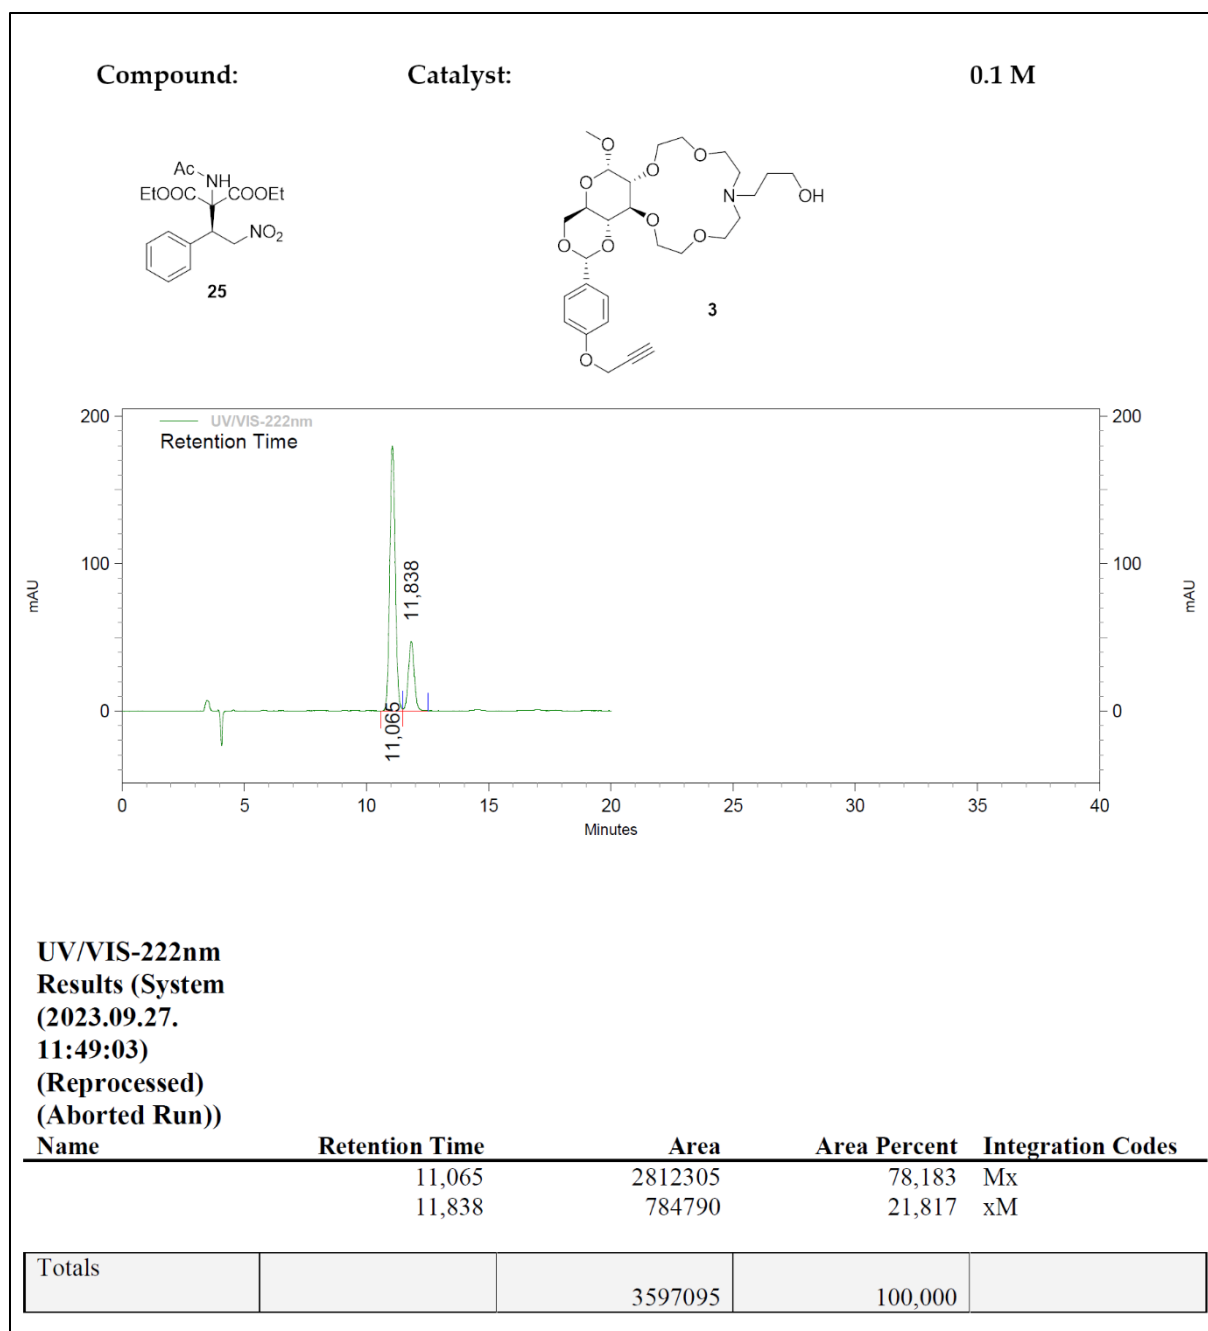

**Figure S27.** Chiral HPLC chromatogram of **25** (Table 1, Entry 6).

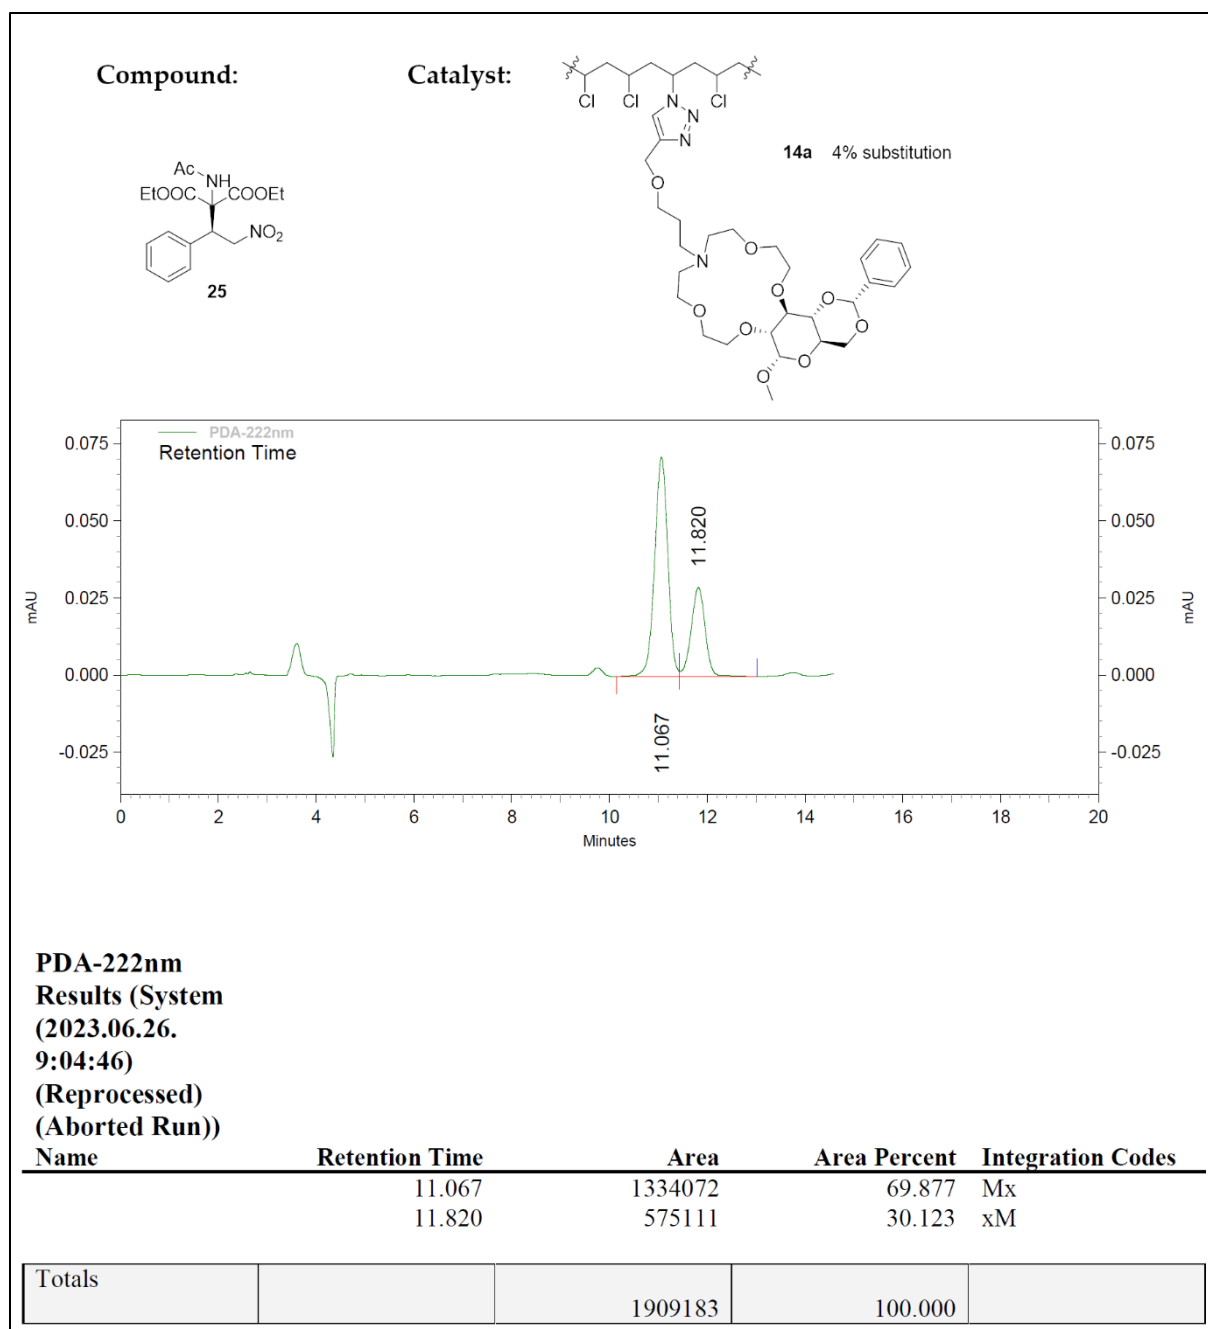

**Figure S28.** Chiral HPLC chromatogram of **25** (Table 2, Entry 1).

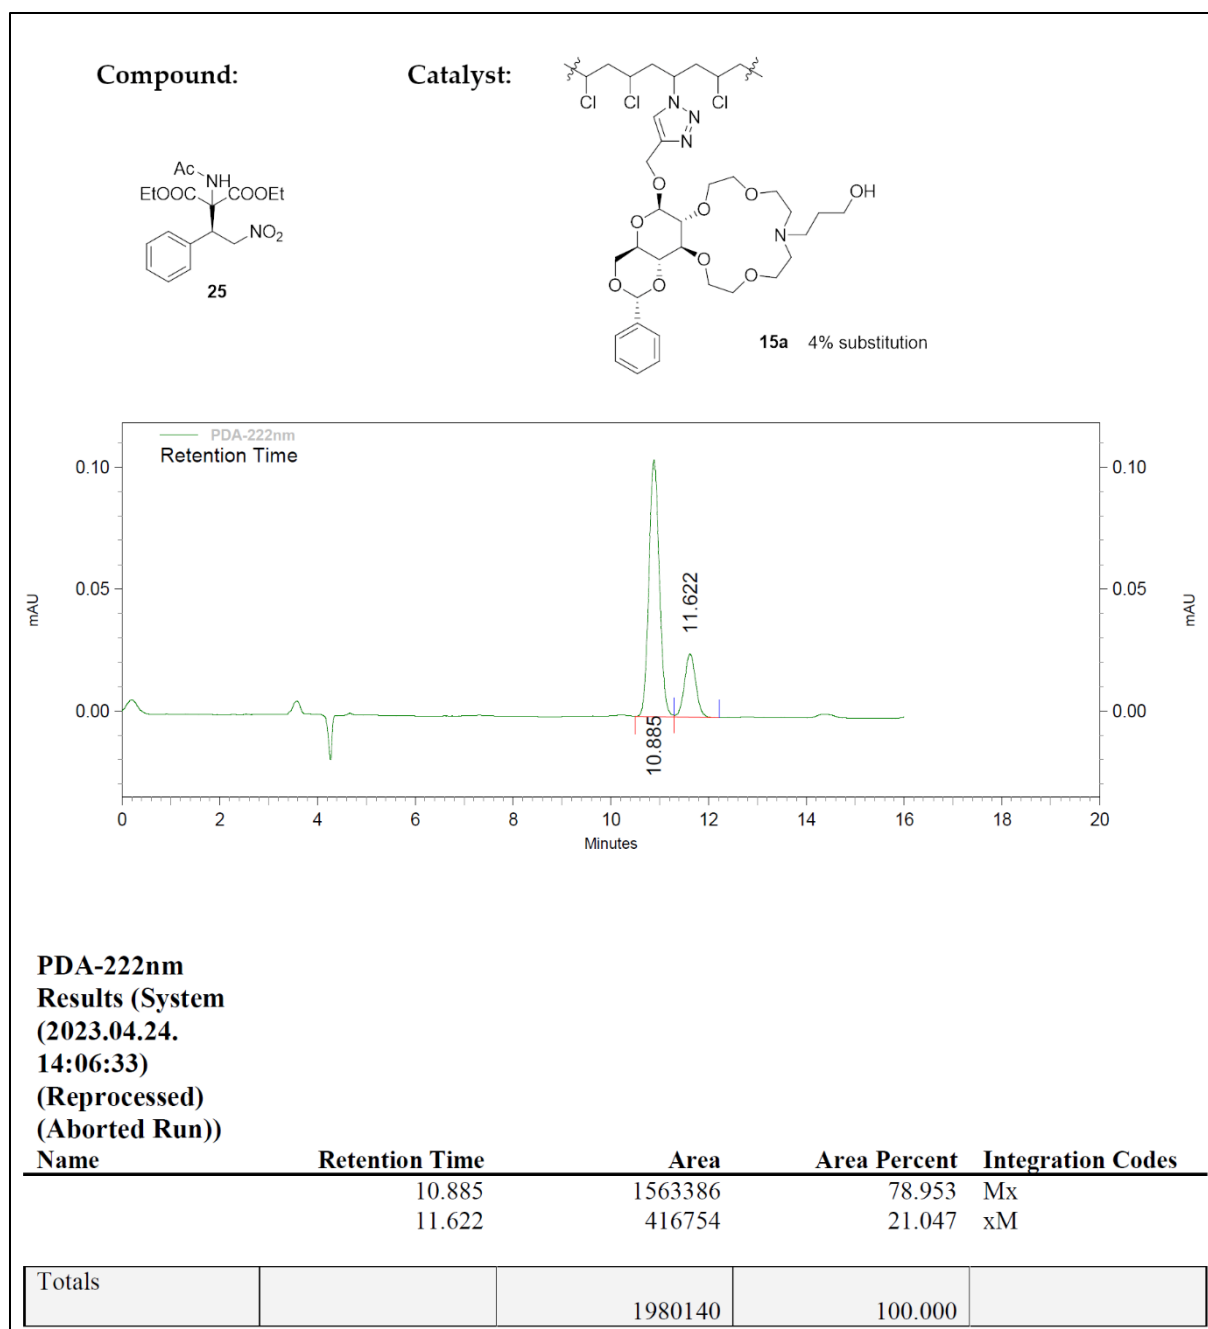

**Figure S29.** Chiral HPLC chromatogram of **25** (Table 2, Entry 2).

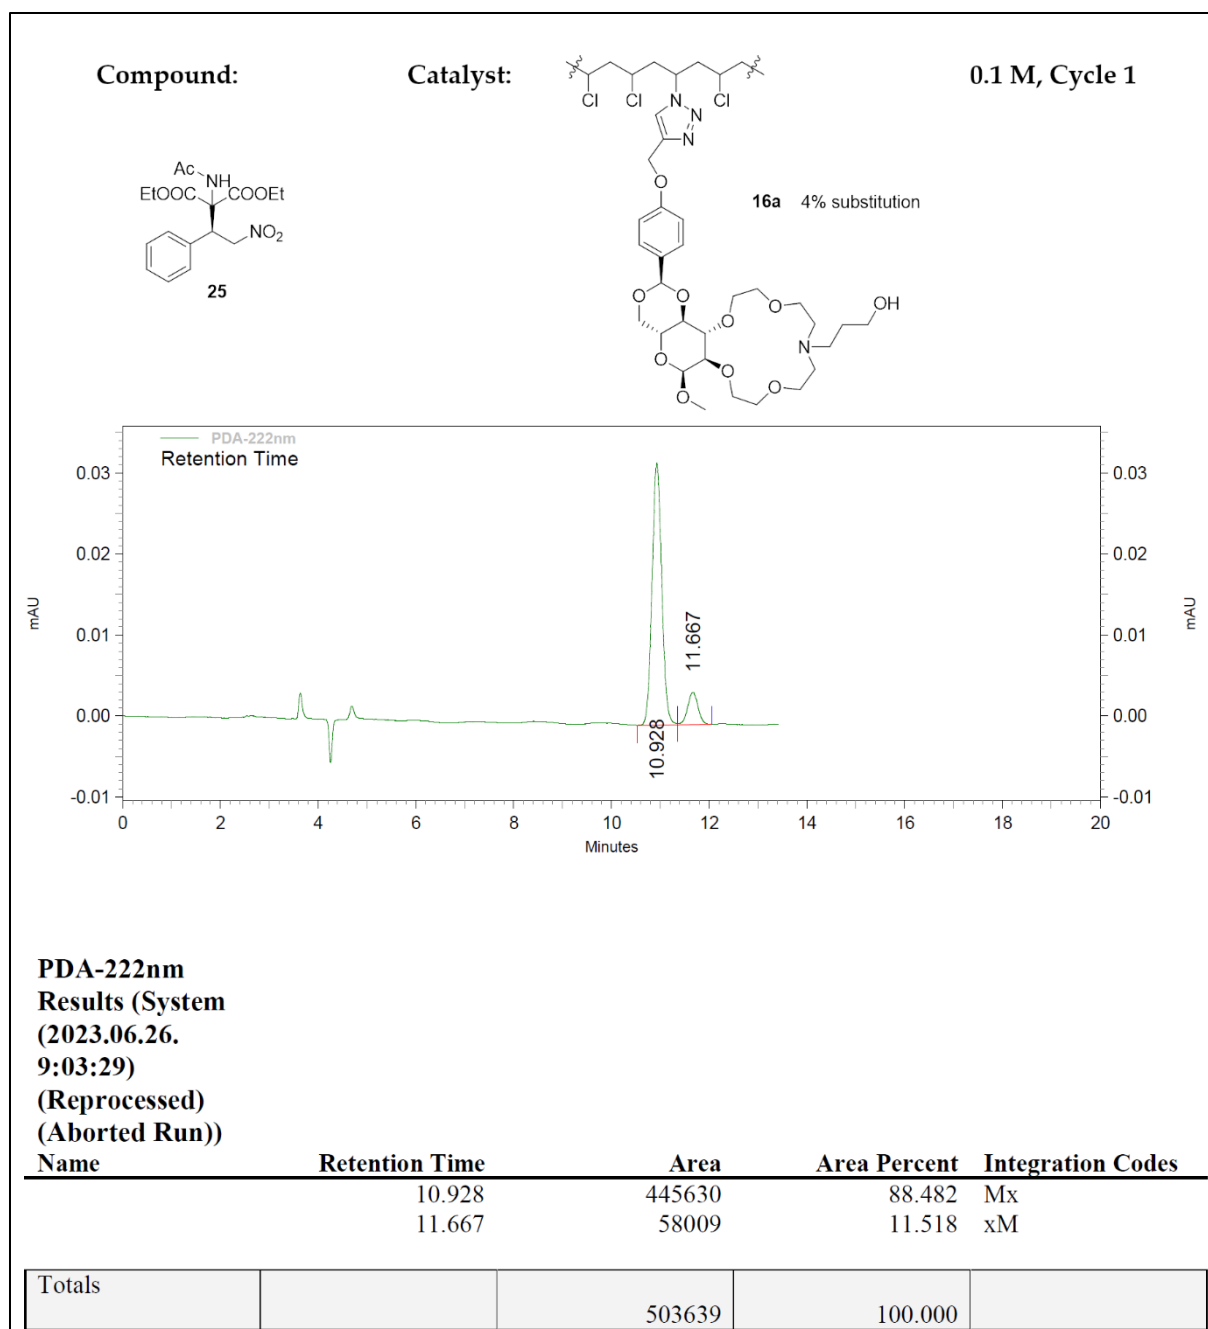

**Figure S30.** Chiral HPLC chromatogram of **25** (Table 2, Entry 3, Cycle 1).



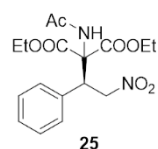

25

**Catalyst:**

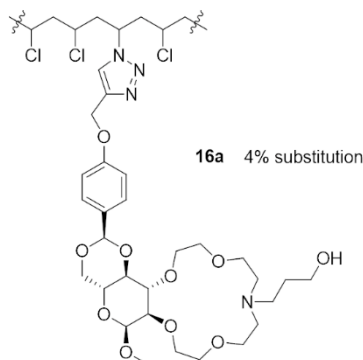

**16a** 4% substitution

0.1 M, Cycle 3

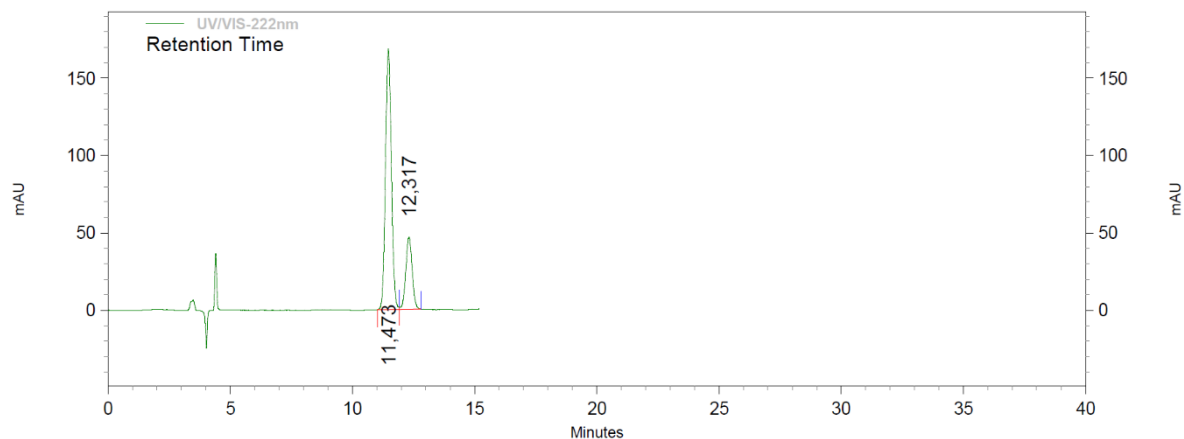

**UV/VIS-222nm  
Results (System  
(2023.10.25.  
13:51:56)  
(Reprocessed)  
(Aborted Run))**

| Name   | Retention Time | Area    | Area Percent | Integration Codes |
|--------|----------------|---------|--------------|-------------------|
|        | 11,473         | 2840391 | 77,101       | Mx                |
|        | 12,317         | 843617  | 22,899       | xM                |
| Totals |                | 3684008 | 100,000      |                   |

**Figure S32.** Chiral HPLC chromatogram of **25** (Table 2, Entry 3, Cycle 3).

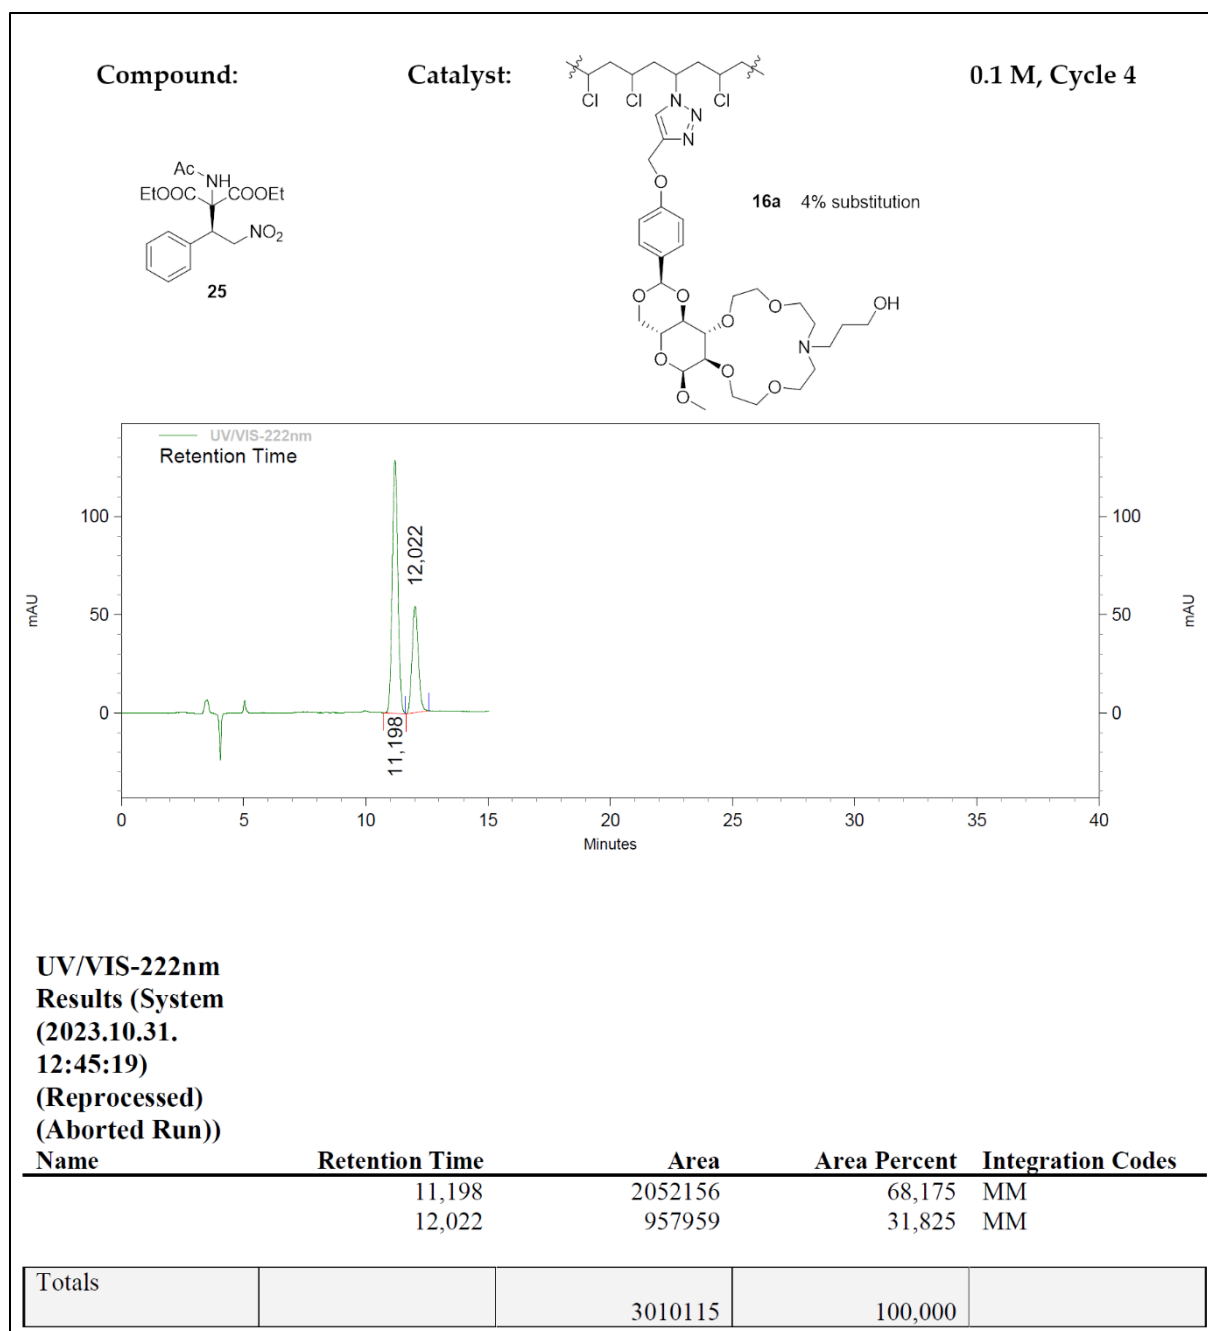

**Figure S33.** Chiral HPLC chromatogram of **25** (Table 2, Entry 3, Cycle 4).



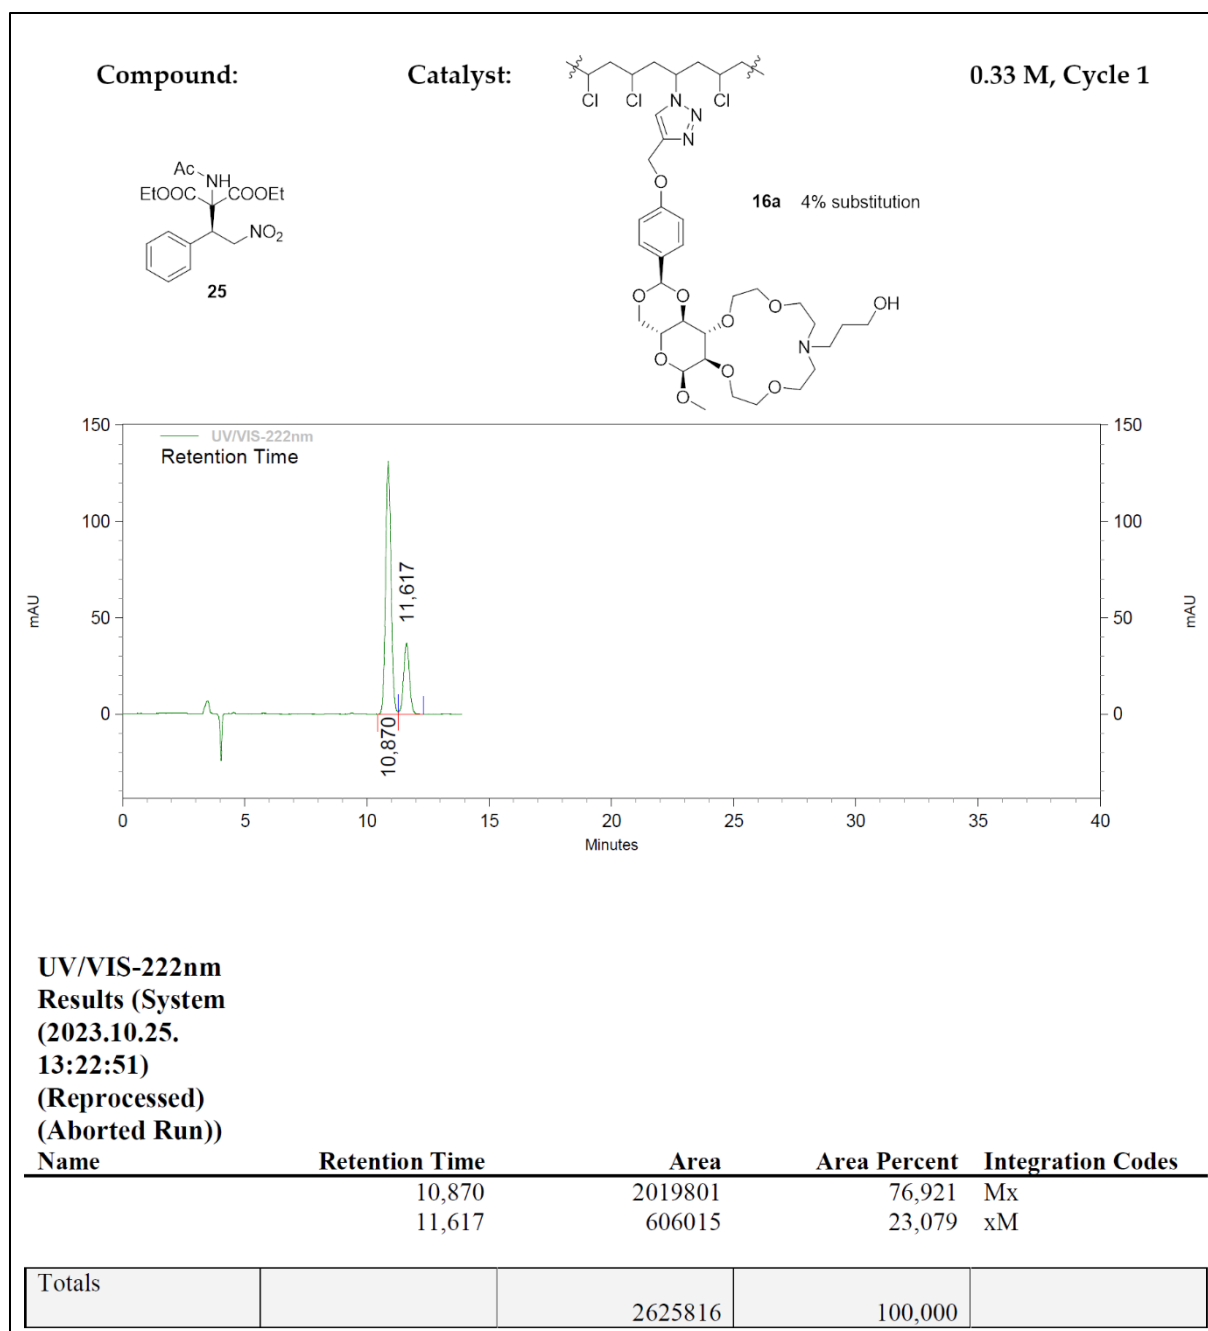

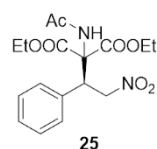

25

**Catalyst:**



**16a** 4% substitution

0.33 M, Cycle 2

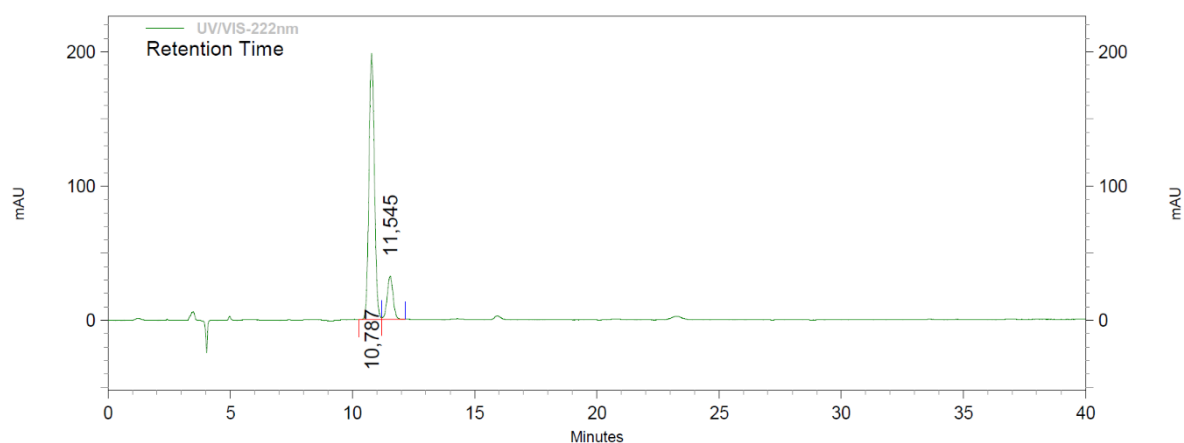

**UV/VIS-222nm  
Results (System  
(2023.10.25.  
13:21:17)  
(Reprocessed))**

| (Reprocessed) |                |         |              |                   |
|---------------|----------------|---------|--------------|-------------------|
| Name          | Retention Time | Area    | Area Percent | Integration Codes |
|               | 10,787         | 3088201 | 85,150       | Mx                |
|               | 11,545         | 538565  | 14,850       | xM                |
| Totals        |                | 3626766 | 100,000      |                   |

**Figure S36.** Chiral HPLC chromatogram of **25** (Table 2, Entry 4, Cycle 2).

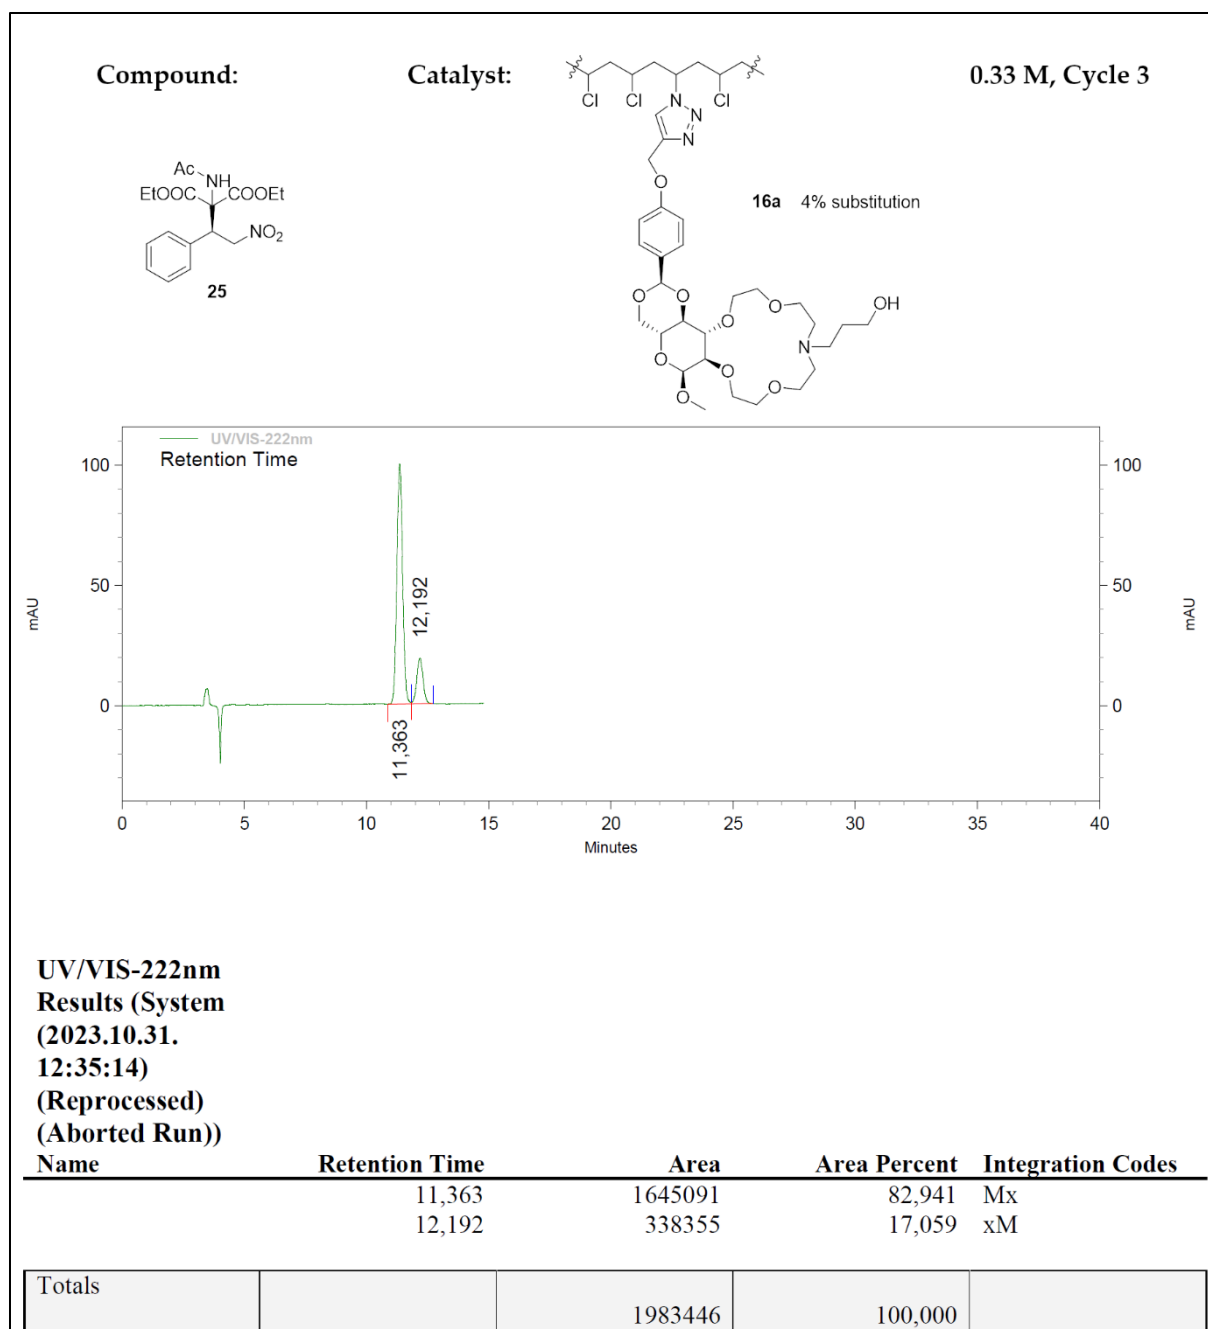

**Figure S37.** Chiral HPLC chromatogram of **25** (Table 2, Entry 4, Cycle 3).

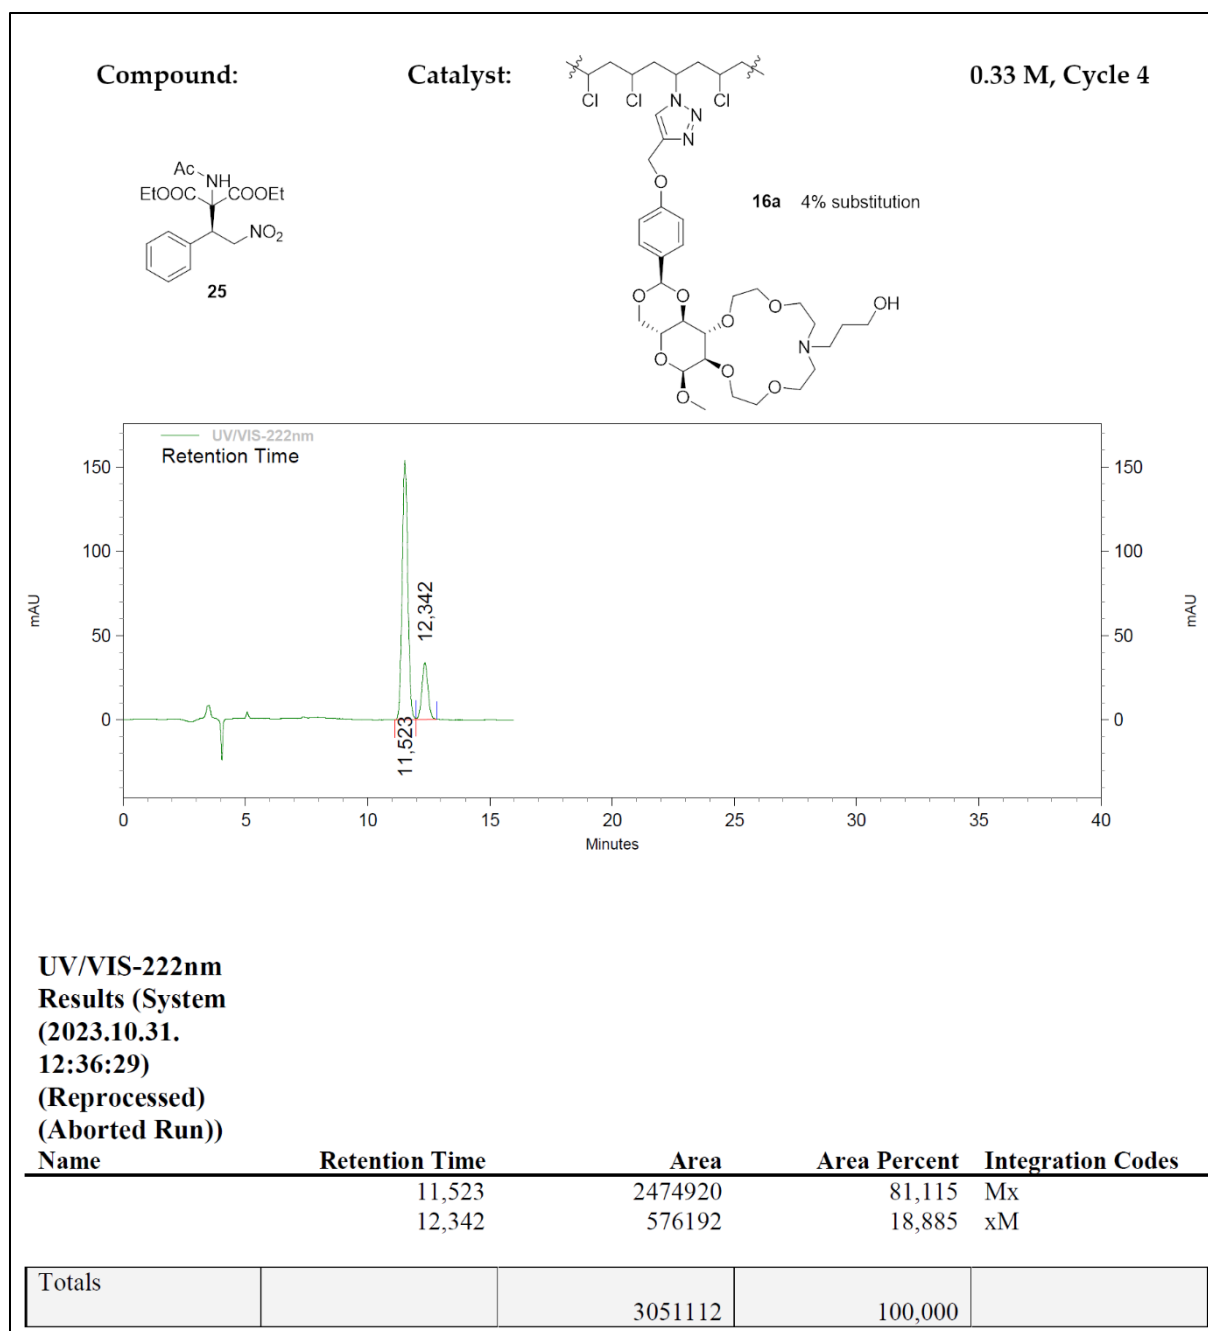

**Figure S38.** Chiral HPLC chromatogram of **25** (Table 2, Entry 4, Cycle 4).

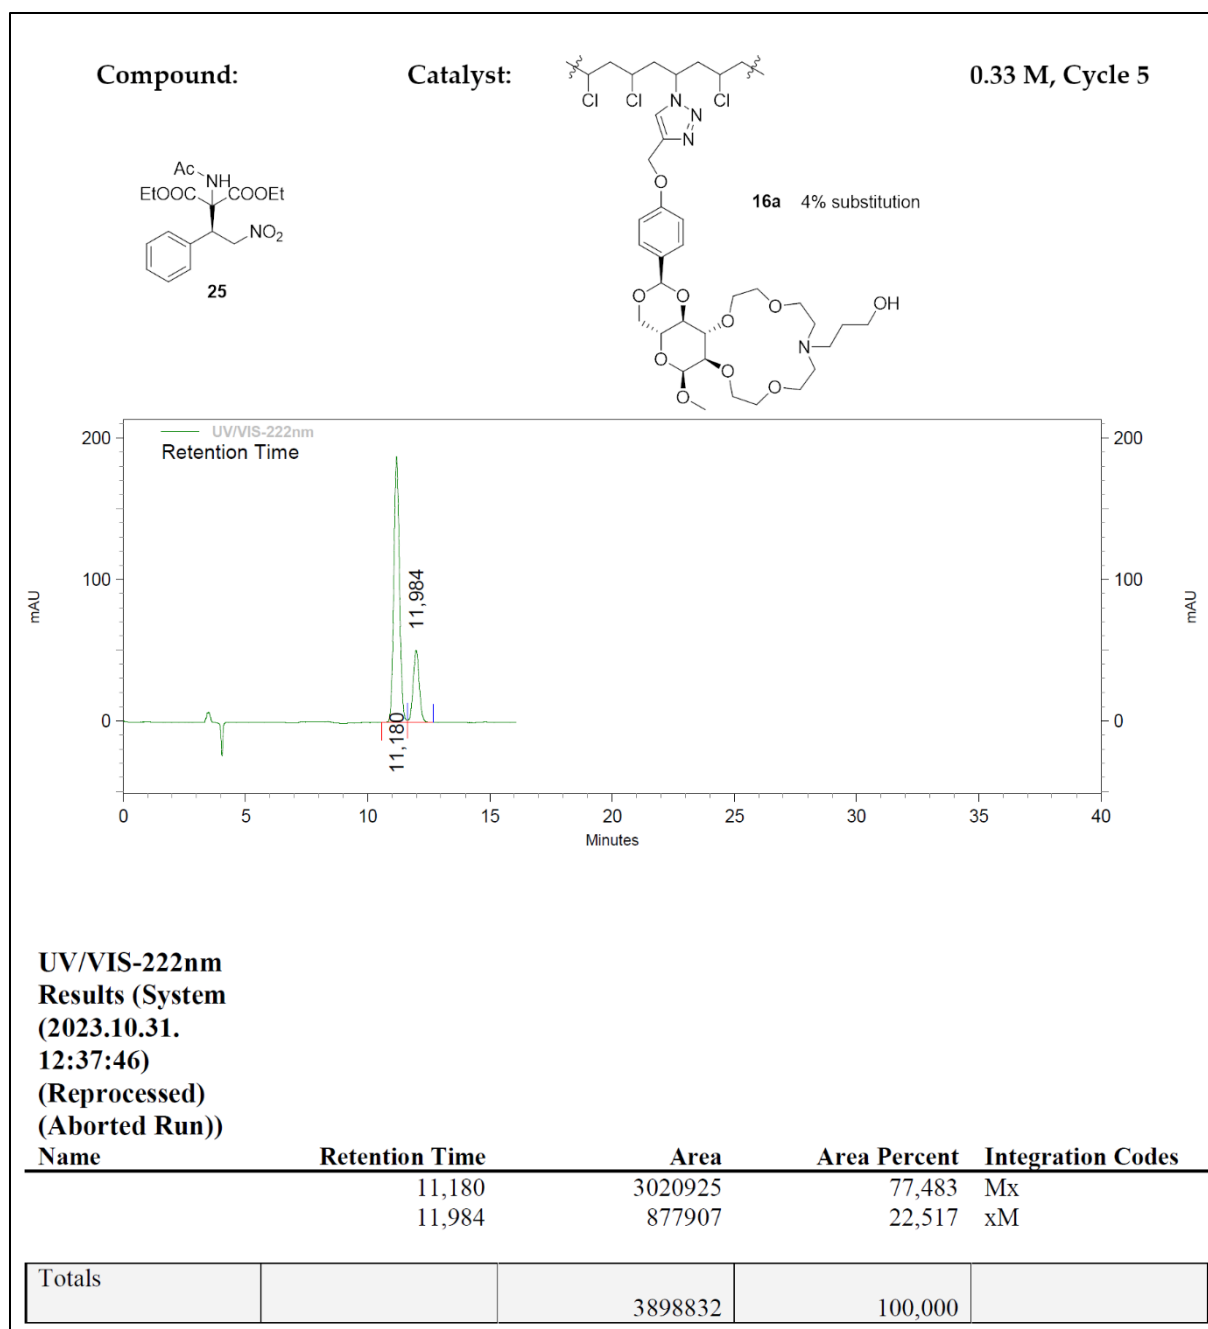

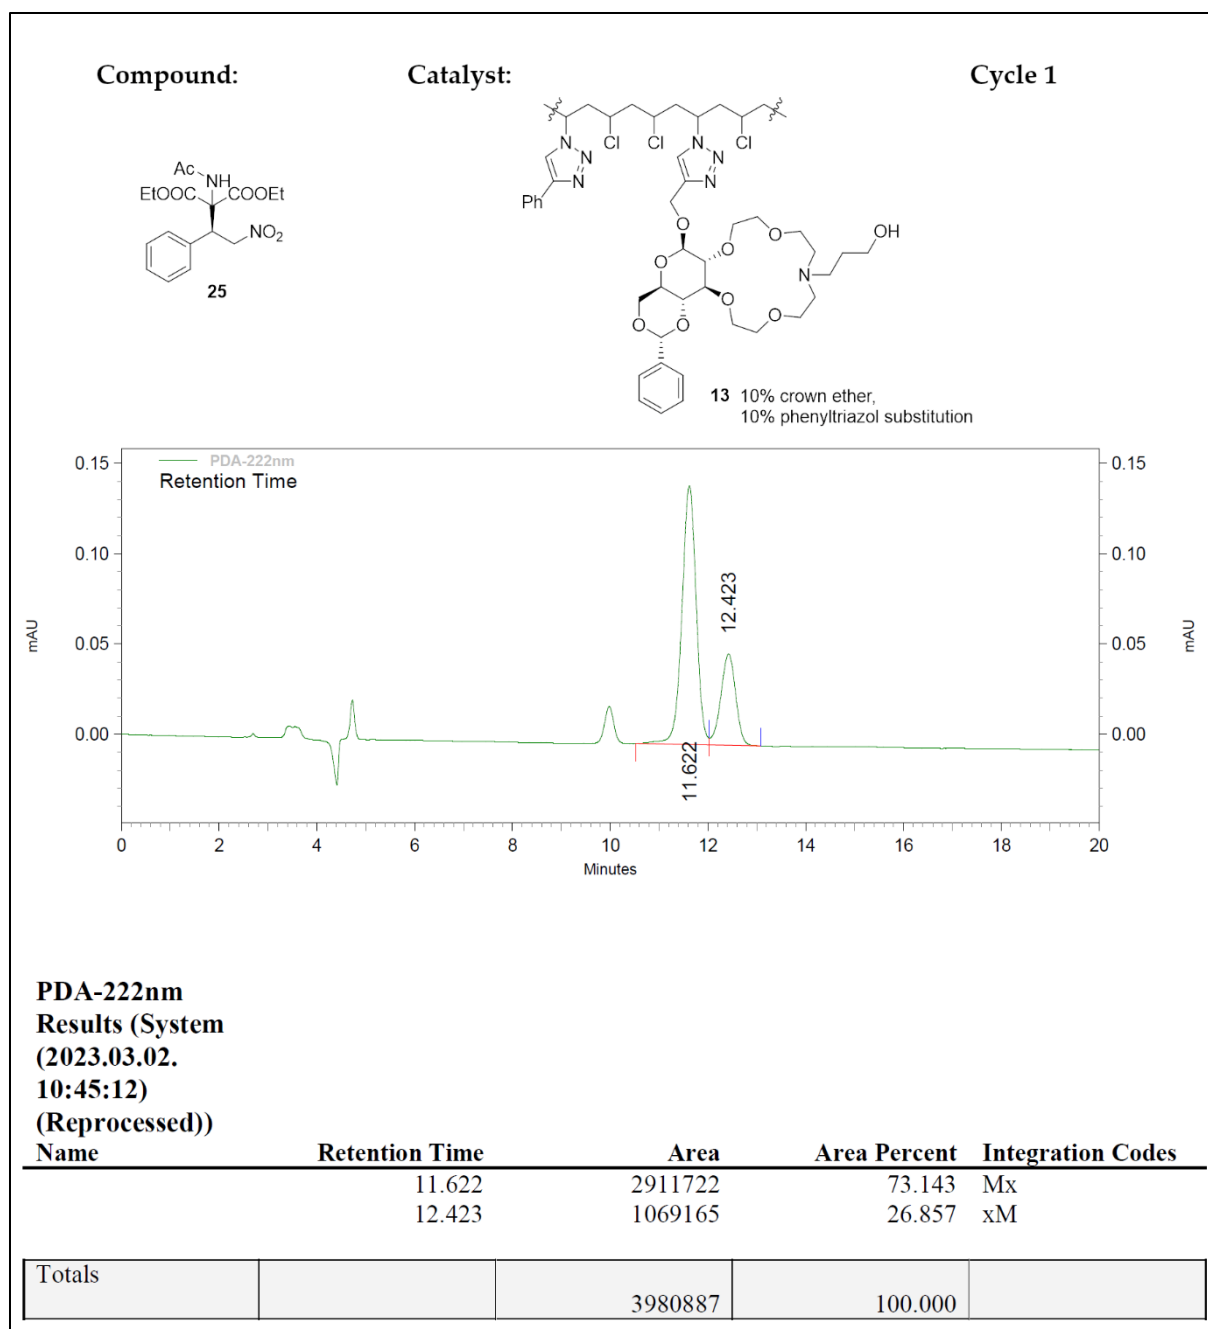

**Figure S40.** Chiral HPLC chromatogram of **25** (Table 2, Entry 5, Cycle 1).

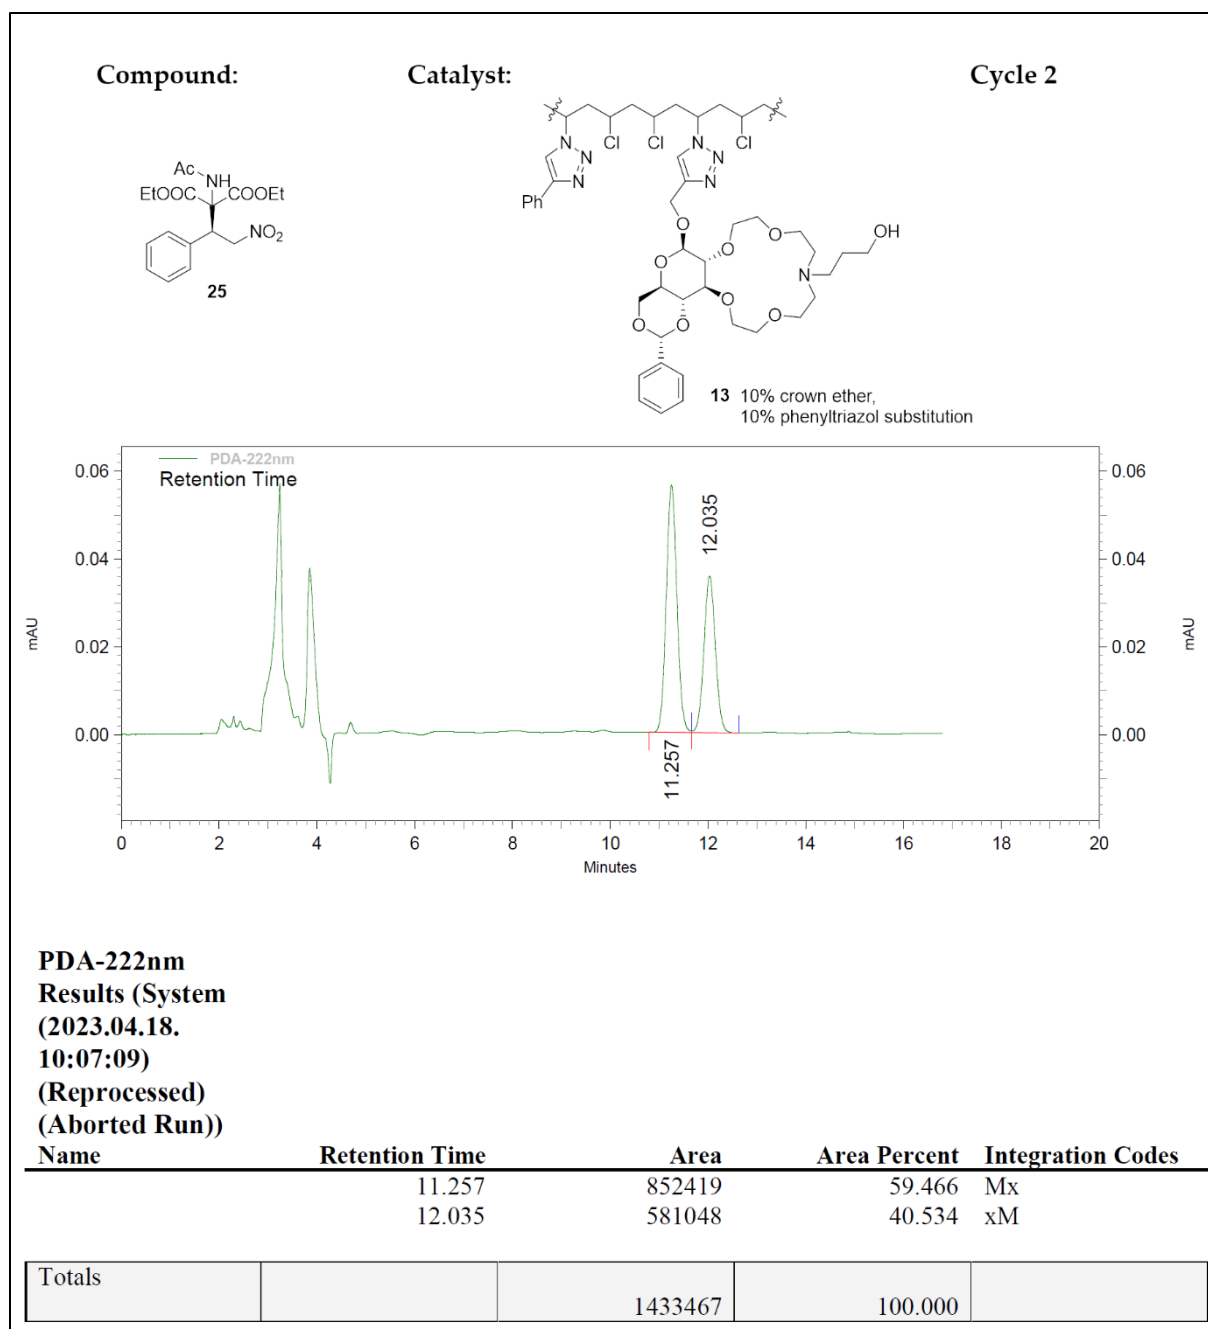

**Figure S41.** Chiral HPLC chromatogram of **25** (Table 2, Entry 5, Cycle 2).

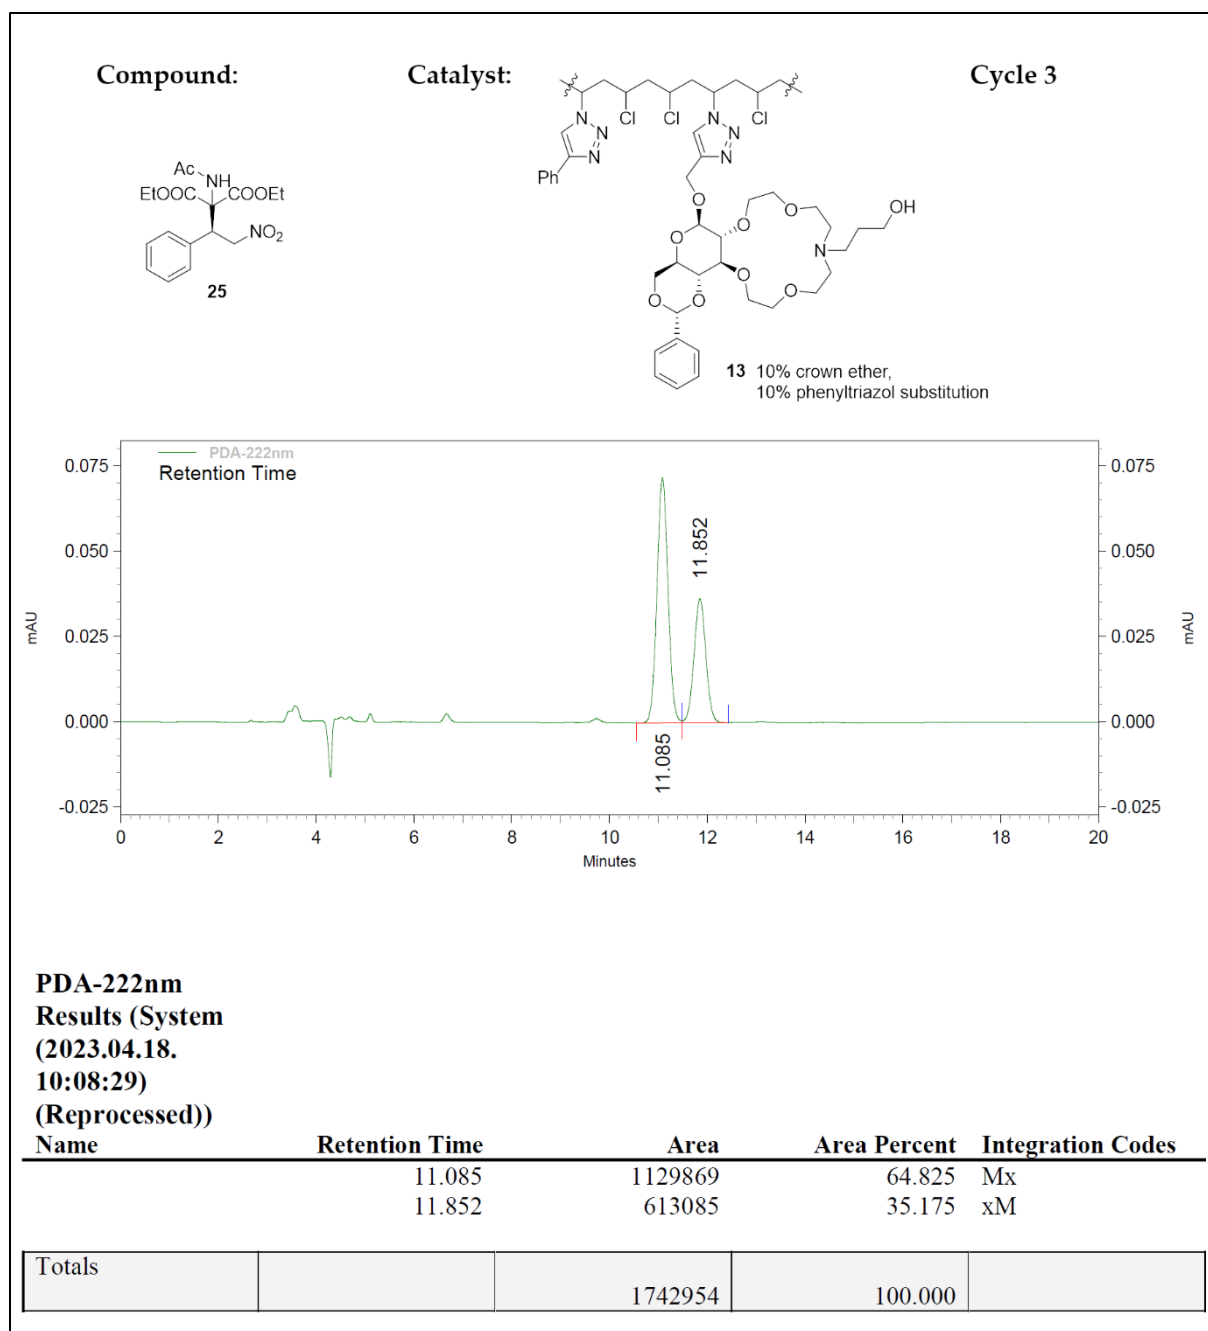

**Figure S42.** Chiral HPLC chromatogram of **25** (Table 2, Entry 5, Cycle 3).

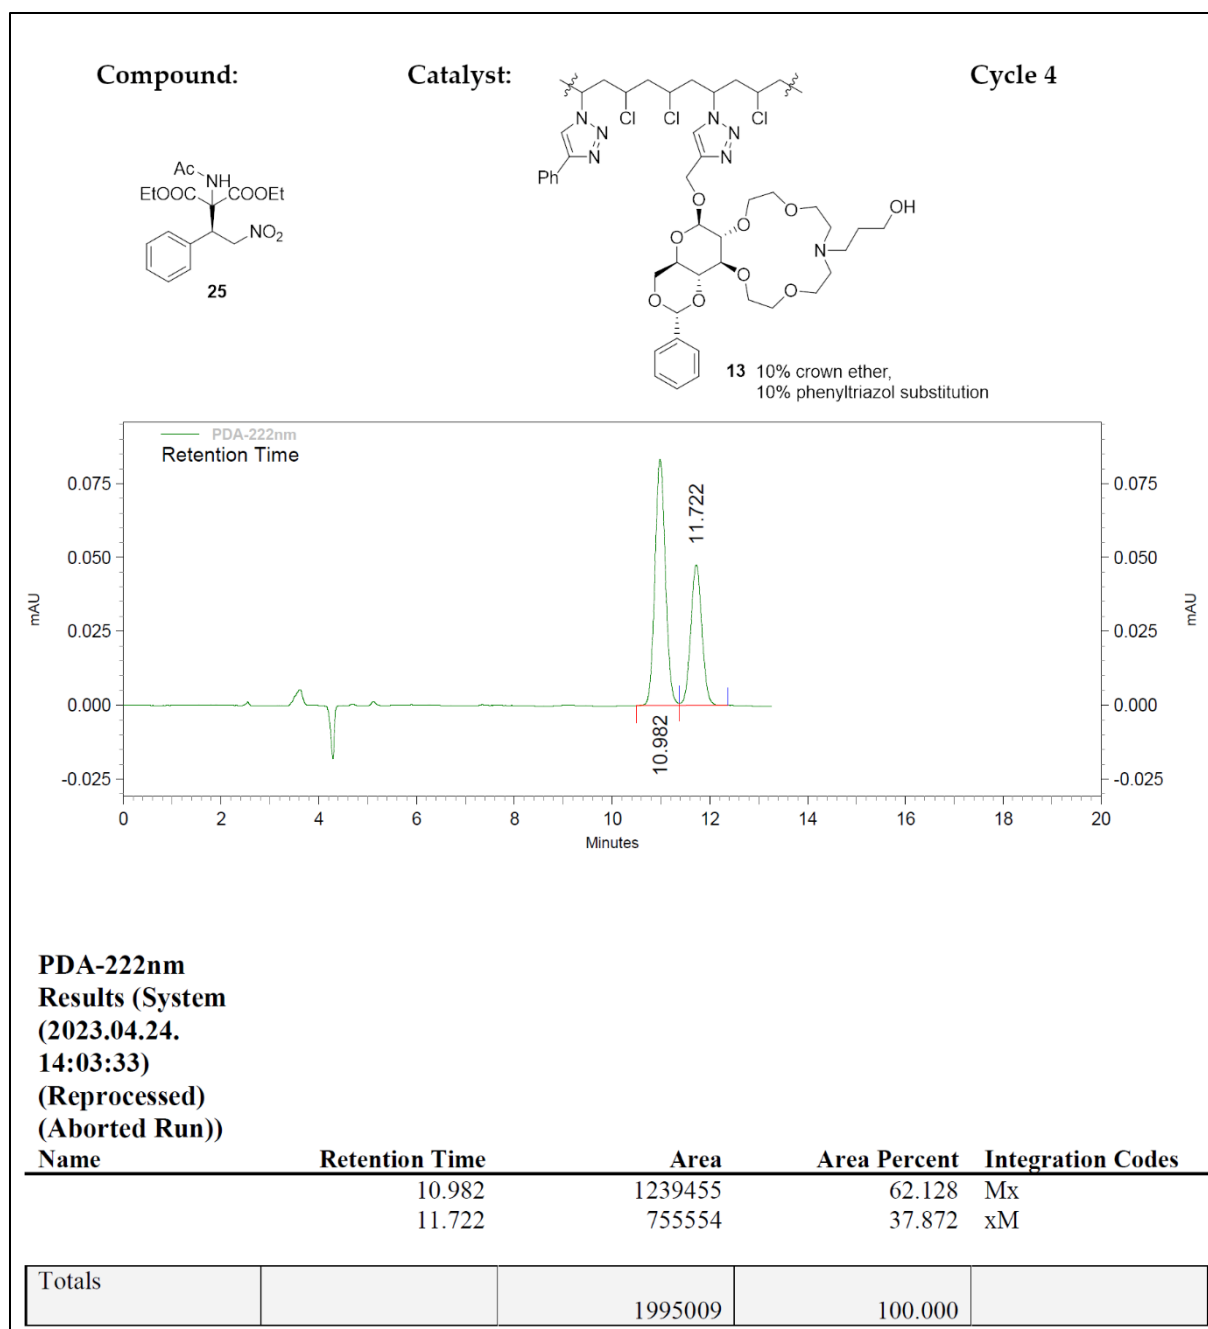

**Figure S43.** Chiral HPLC chromatogram of **25** (Table 2, Entry 5, Cycle 4).

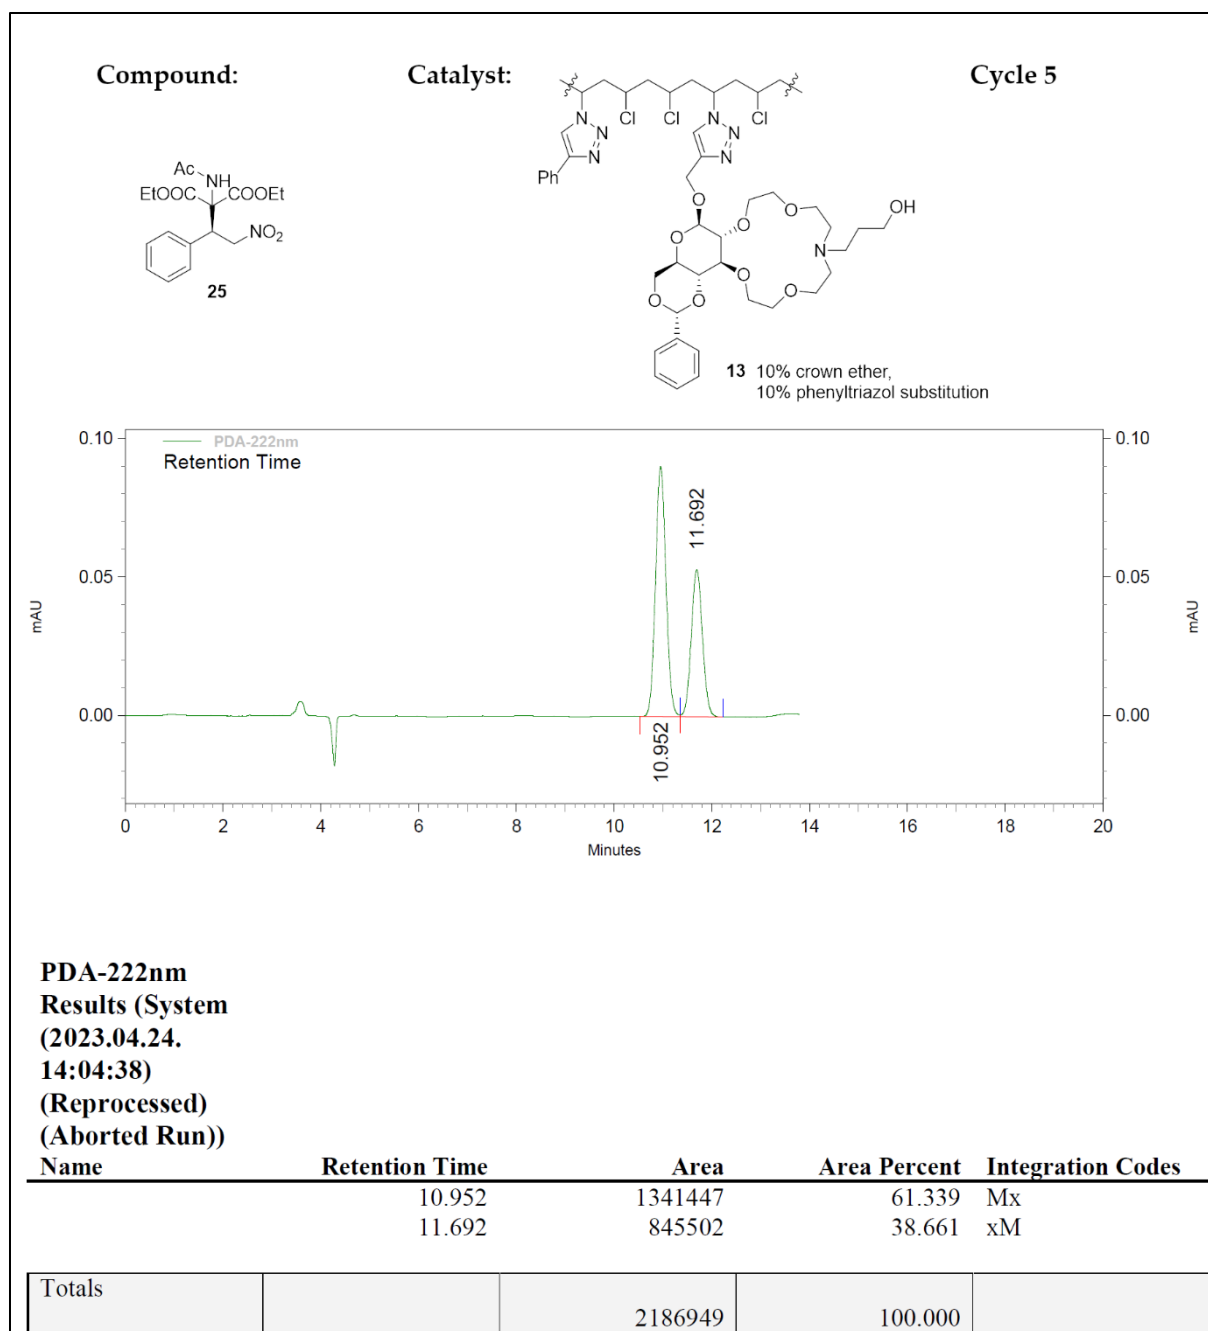

**Figure S44.** Chiral HPLC chromatogram of **25** (Table 2, Entry 5, Cycle 5).

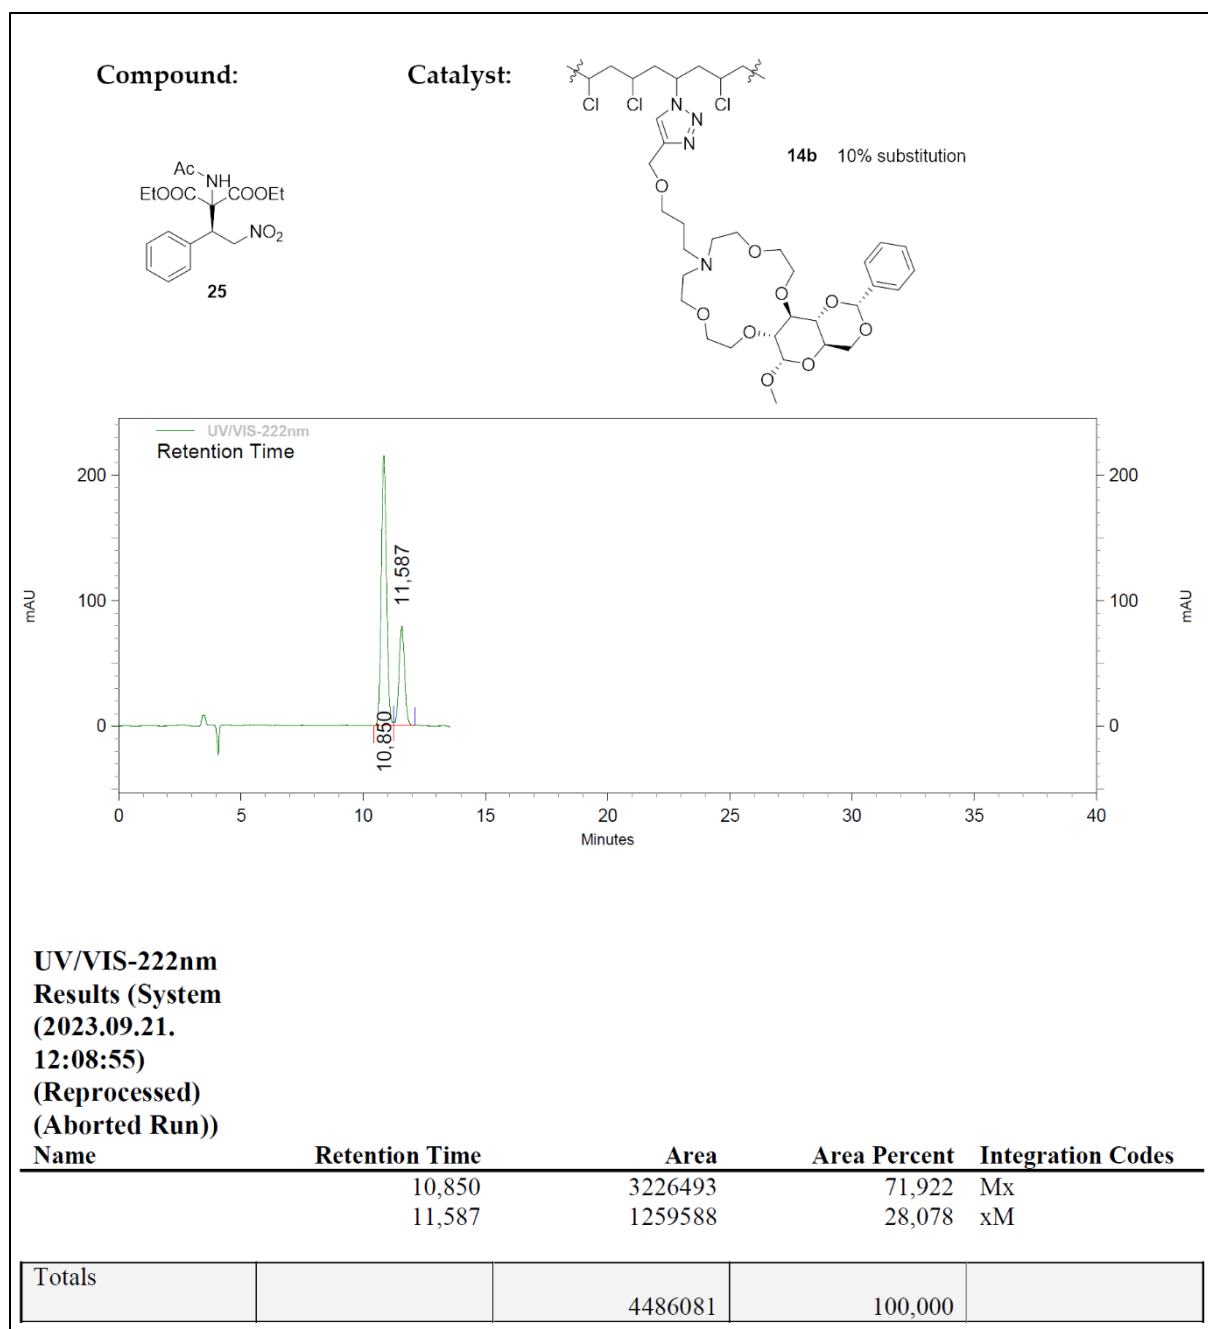

**Figure S45.** Chiral HPLC chromatogram of **25** (Table 2, Entry 6).

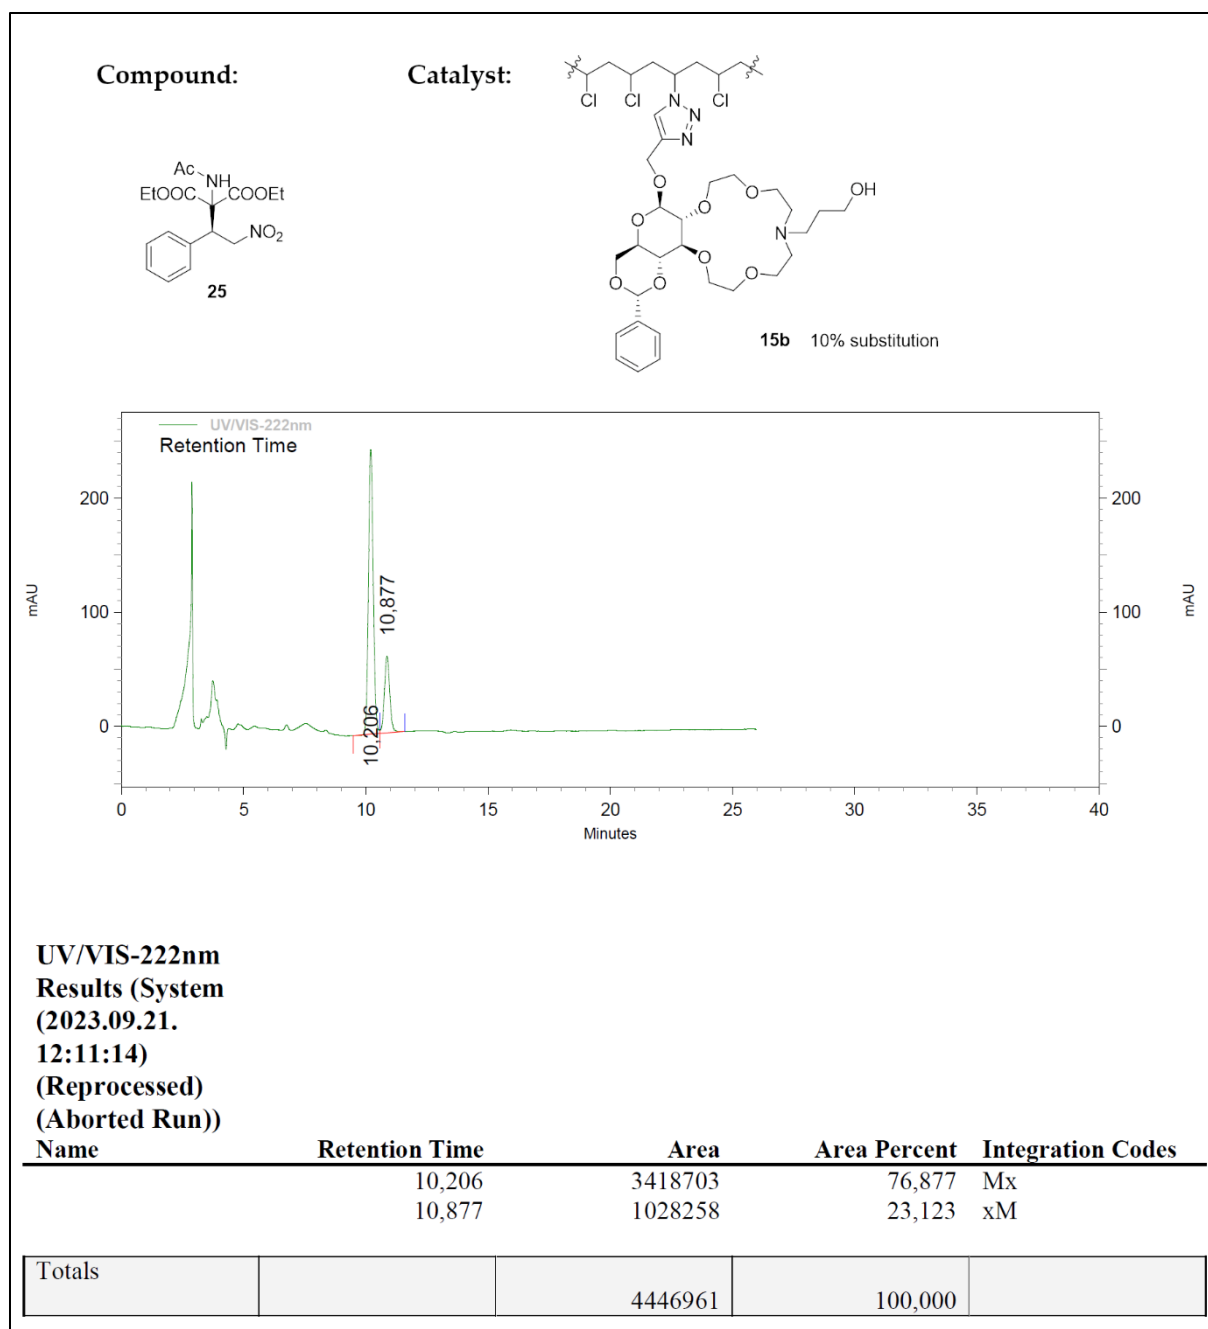

**Figure S46.** Chiral HPLC chromatogram of **25** (Table 2, Entry 7).

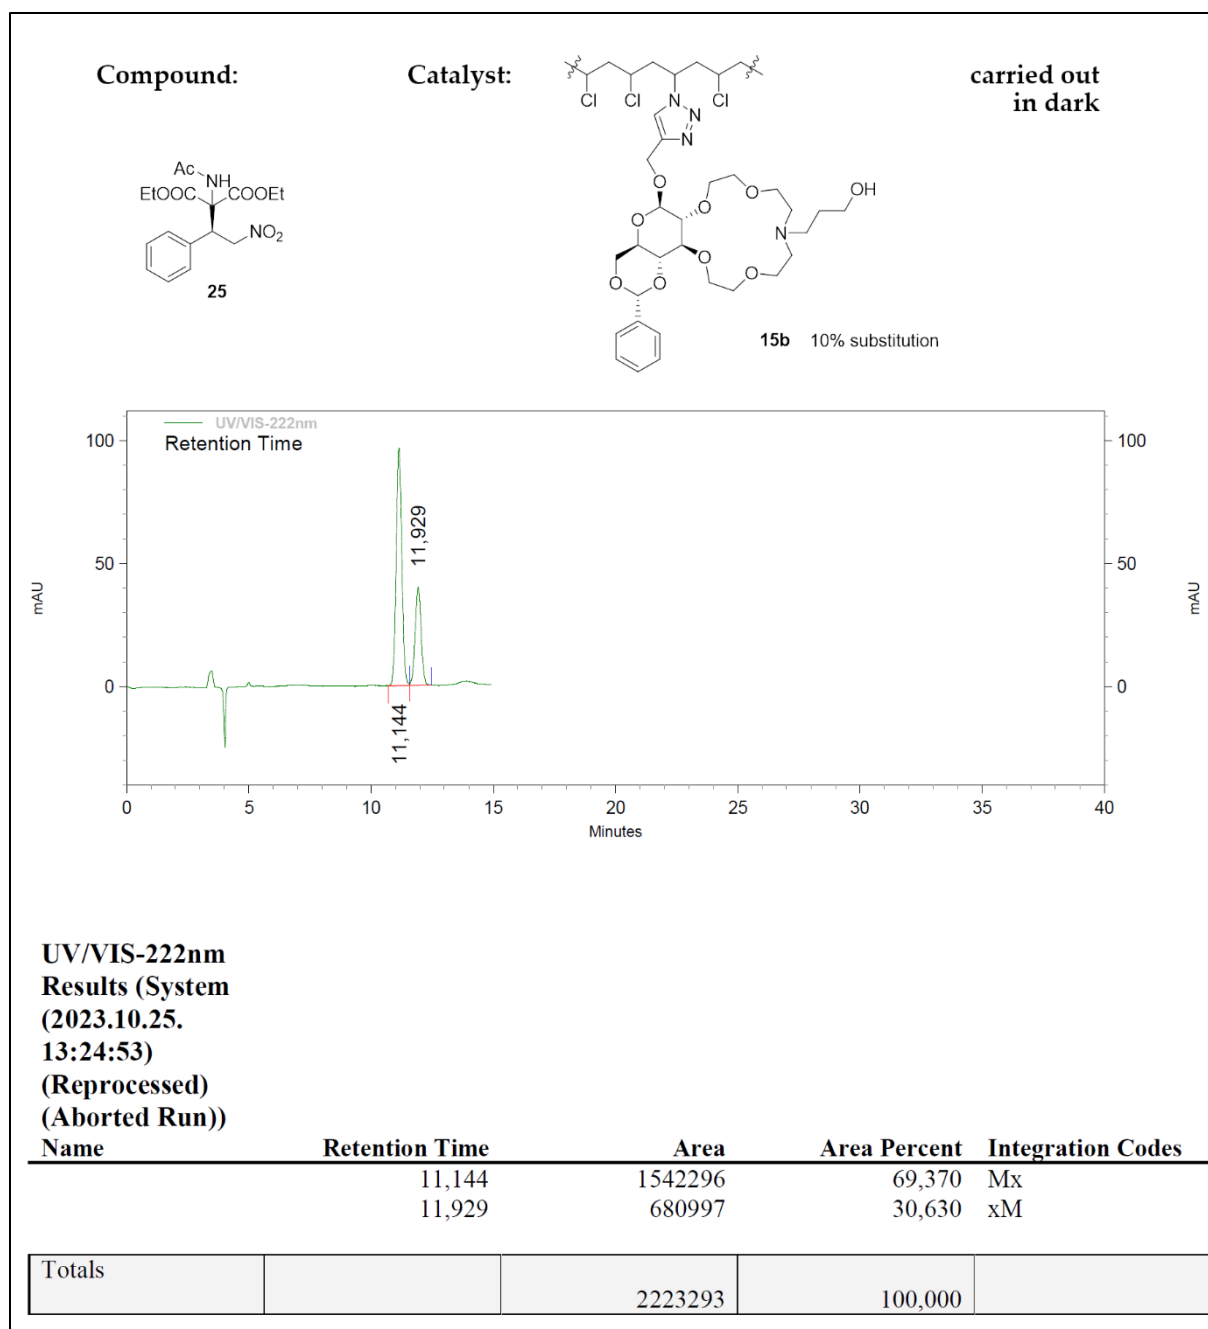

**Figure S47.** Chiral HPLC chromatogram of **25** (Table 2, Entry 8).

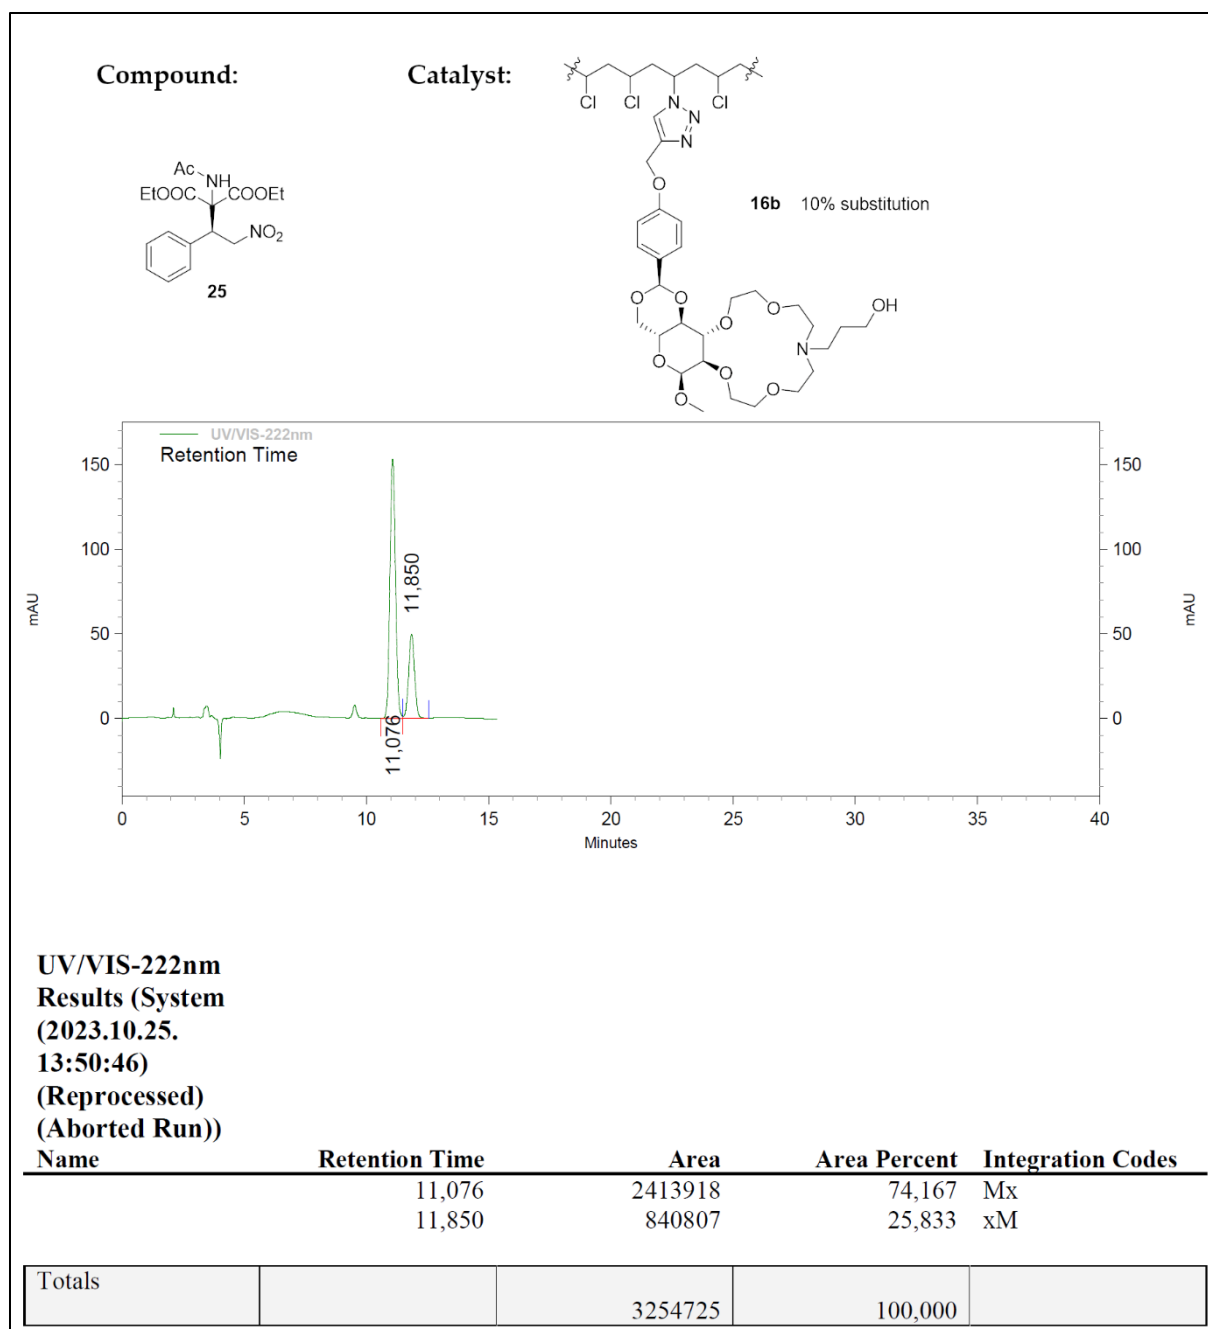

**Figure S48.** Chiral HPLC chromatogram of **25** (Table 2, Entry 9).
